# Supplementary material for: Single-virus genomics reveals hidden cosmopolitan and abundant viruses
Source: PubMed Central journal article supplement (PMC5490008; doi:10.1038/ncomms15892), 2017-06-23
Supplement: ncomms15892-s1.pdf [file ncomms15892-s1.pdf]

**Title of file for HTML:** Supplementary Information

**Description:** Supplementary Figures, Supplementary Tables, Supplementary Notes, Supplementary Methods and Supplementary References

**Title of file for HTML:** Peer Review File

**Description:**

## Supplementary Information

### Supplementary Figures

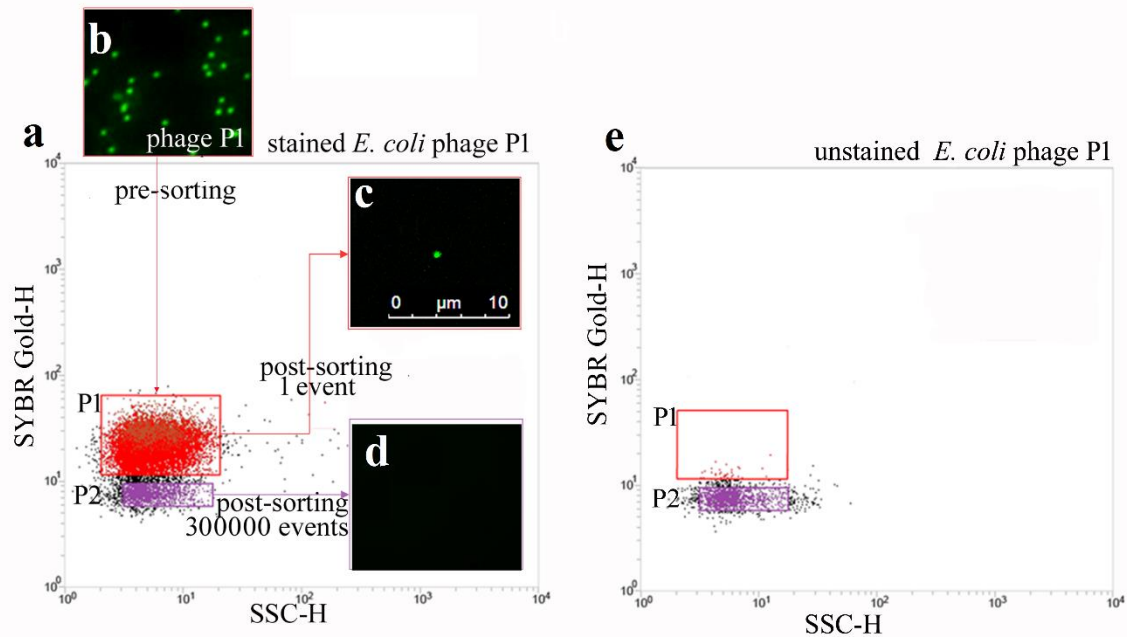

**Supplementary Fig. 1. Fluorescence-activated virus sorting (FAVS) of bacteriophage P1 of *Escherichia coli*.** (a) Flow cytometric plot of 90° light (side) scatter (SSC-H; height value) vs. green fluorescence after staining with SYBR Gold, (SYBR Gold-H; height value, relative units) of *E. coli* phage P1. Selected sorting gate of individual viral particles is indicated in red (gate P1). Background noise, gate P2. (b) Epifluorescence microscopy image of phage P1 culture used for sorting (pre-FAVS). (c) Confocal laser scanning microscopy of 1 sorted individual virus (post-sorting). A thorough scan was performed to rule out the presence of doublets or more coincident events. The experiment was repeated five times with identical results. (d) Epifluorescence image of 300,000 sorted events from background noise (gate P2). No stained viruses were detected in this area. (e) Flow cytometric plot of the unstained phage P1 (blank control).

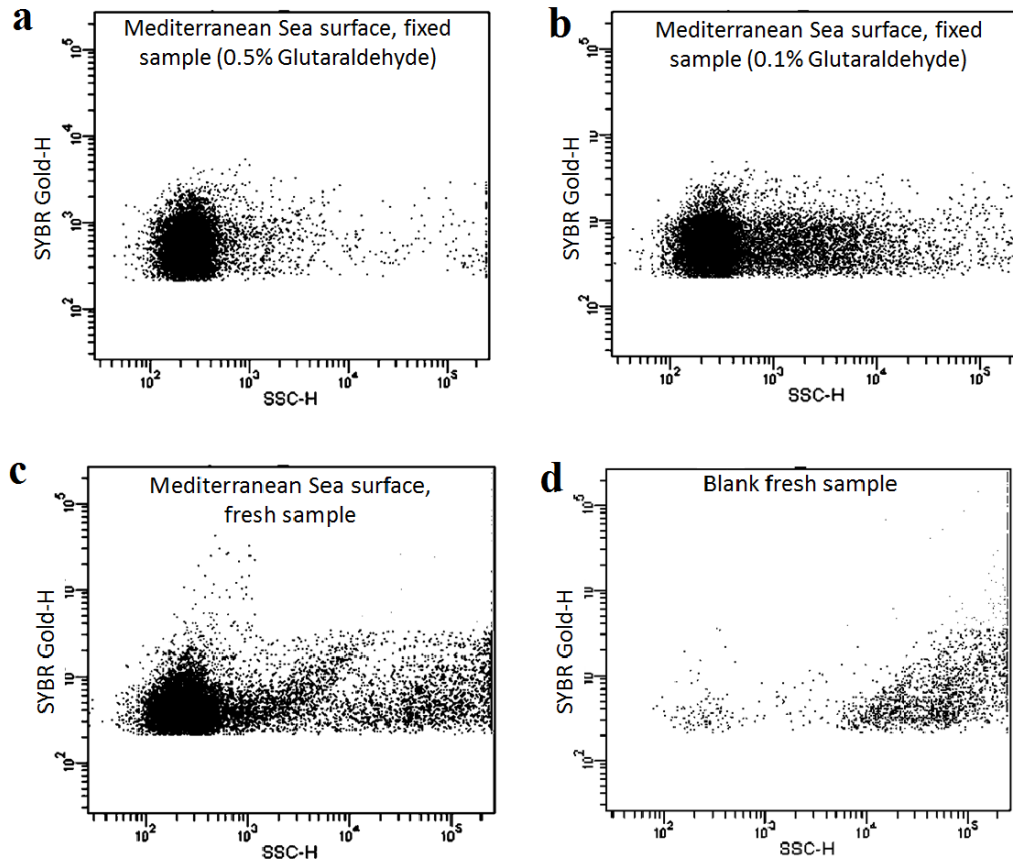

**Supplementary Fig. 2. Virus staining optimization for fluorescence-activated virus sorting (FAVS).** The standard and reference protocol used for staining and detection of viruses by flow cytometry for aquatic samples was that previously published by Corina Brussard<sup>1</sup>. However, the amount of fixative (0.5% glutaraldehyde) used in that protocol prevent the amplification of genetic material by multiple displacement amplification (MDA) and consequently subtle variations on that protocol were performed (see methods). Comparison of the staining of same marine viral samples with different fixation treatments (see Methods for details): fixed with 0.5% (panel **a**; reference protocol by Corina Brussard<sup>1</sup>), with 0.1% glutaraldehyde (**b**), and fresh (unfixed) sample (**c**). Samples were stained with SYBR Gold 0.5X final concentration (see Methods for details). Flow cytometry was performed using FACS Canto II (see Methods). Our results indicated that the staining procedures used in this study showed similar results than the reference protocol traditionally used in viral ecology to count and detect viruses from natural marine samples.

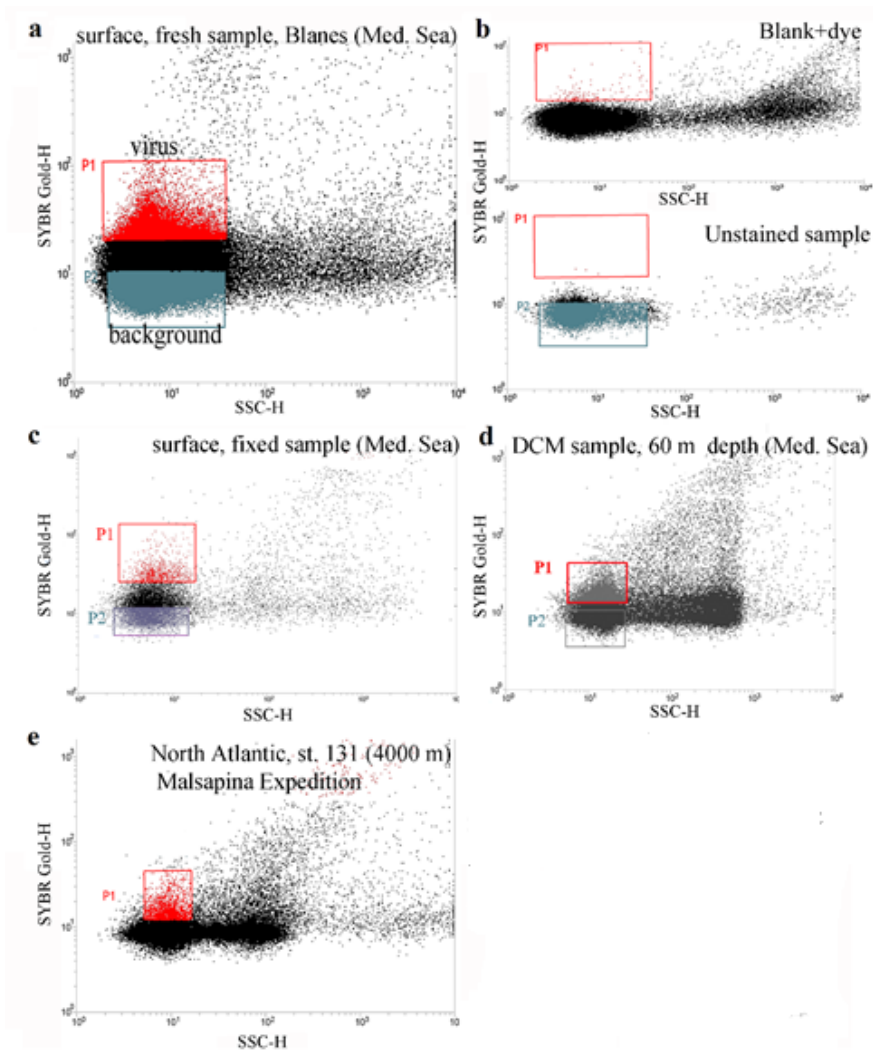

**Supplementary Fig. 3. Fluorescence-activated virus sorting (FAVS) of marine and human salivary samples.** For each sample, flow cytometric plot of  $90^\circ$  light scatter (SSC-H; height value) and green fluorescence, (SYBR Gold-H; height value, relative units) is shown. Gate P1 was used for sorting of single-viruses. **(a)** Surface seawater sample from the Blanes Bay Microbial Observatory (BBMO, Spain) in the Mediterranean Sea. **(b)** Blank and unstained viral fraction for the BBMO sample. No fluorescence signal was observed in gate P1. For all marine samples data from negatives were very similar. For convenience only negative and blank data are shown for BBMO. **(c)** Surface seawater sample from the Barcelona Beach (Barcelona, Spain) from the Mediterranean Sea. **(d)** Seawater sample from the deep chlorophyll maximum zone in the Mediterranean Sea (depth 60 m). **(e)** Deep seawater samples from the North Atlantic (4,000 m depth). Station 131 from the Malaspina Expedition. The deep seawater sample from station 134 showed a similar flow cytometric pattern.

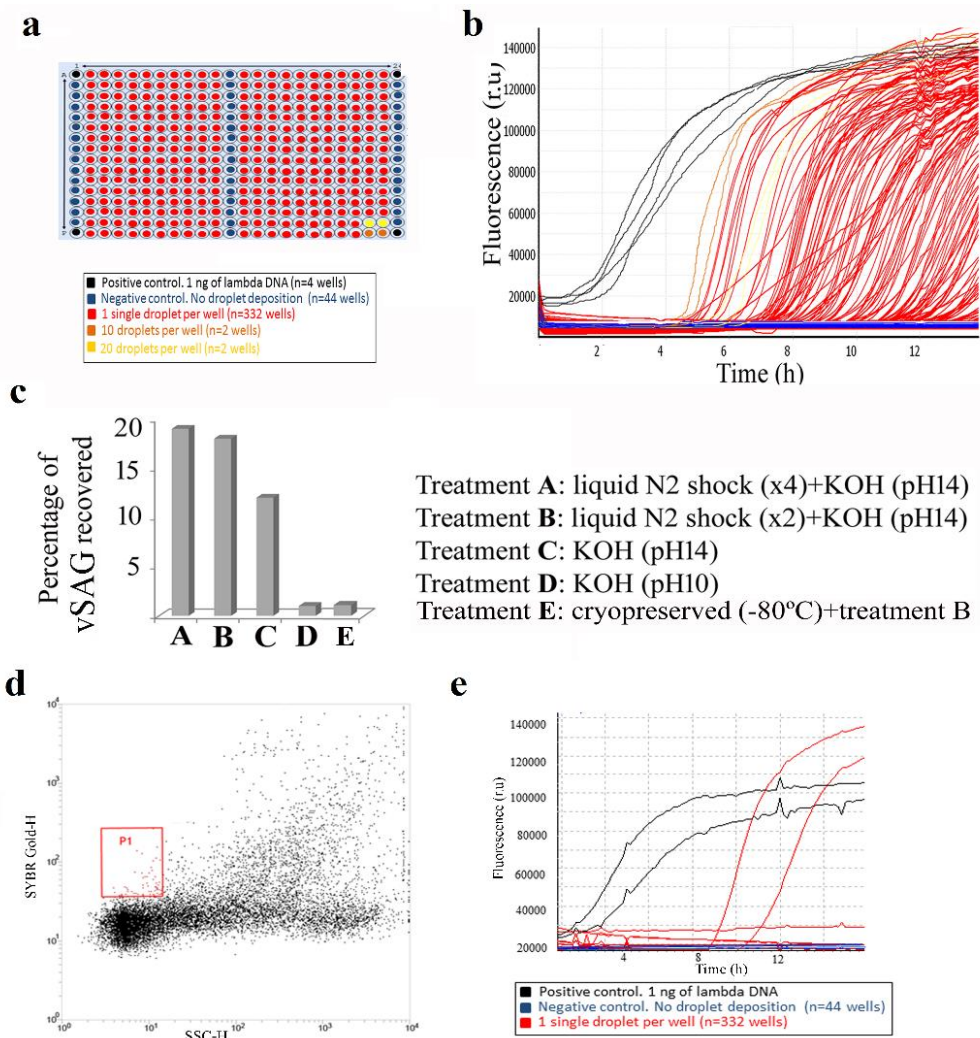

**Supplementary Fig. 4. Whole genome amplification (WGA) of marine single-viruses and assessment of effect of free DNA in seawater on WGA. (a)** Layout of a 384-well plate indicating the wells distribution. **(b)** Real-time multiple displacement amplification (MDA) of the genome of sorted single-viruses from the Blanes Bay Microbial Observatory (BBMO). **(c)** Efficiency of vSAGs recovery according to the various methods employed to break the capsid, with different cycles of freezing in liquid nitrogen followed by a shock in buffer KOH (pH 10 or 14). **(d and e)** Assessment of contribution of free DNA in to whole genome amplification of sorted single-viruses. **(d)** Flow cytometric plot of 90° light scatter (SSC-H; height value) and green SYBR Gold-H fluorescence (relative units, height values) of a stained seawater sample (Barcelona Beach in the Mediterranean Sea) previously filtered through 0.02 μm pore size to remove viruses. Putative free DNA was stained with SYBR Gold and processed as a fresh sample (see methods for details). Note that, as expected, stained putative free DNA were not detected in gate P1 used previously for virus sorting. Gate P1 was restricted for those events with higher fluorescence signals, which in theory would represent large stained free DNA fragments. **(e)** Real-time MDA results of sorted events with putative free DNA molecules deposited in a 384-well plate.

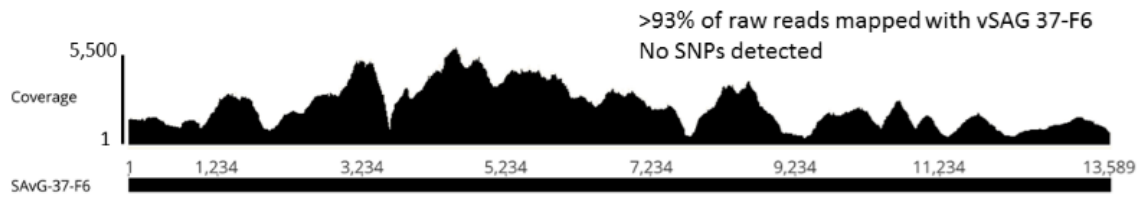

**Supplementary Figure 5: Raw Illumina reads mapping against the assembled genome of vSAG 37-F6.** Nearly all obtained reads for vSAG 37-F6 mapped perfectly without SNPs with the reconstructed genome indicating that the MDA did not generate chimeric artifacts. Only in two vSAGs, the 17-D19 and 41-A4, we observed that for each one, two assembled genome fragments with similar size were obtained with a similarity between 85 and 71%, respectively. We speculate that in this case, two viral particles from the same population could be co-sorted. In the case of vSAG 17-D19, both genome fragments belonged to the same viral cluster (see Supplementary Table 3).

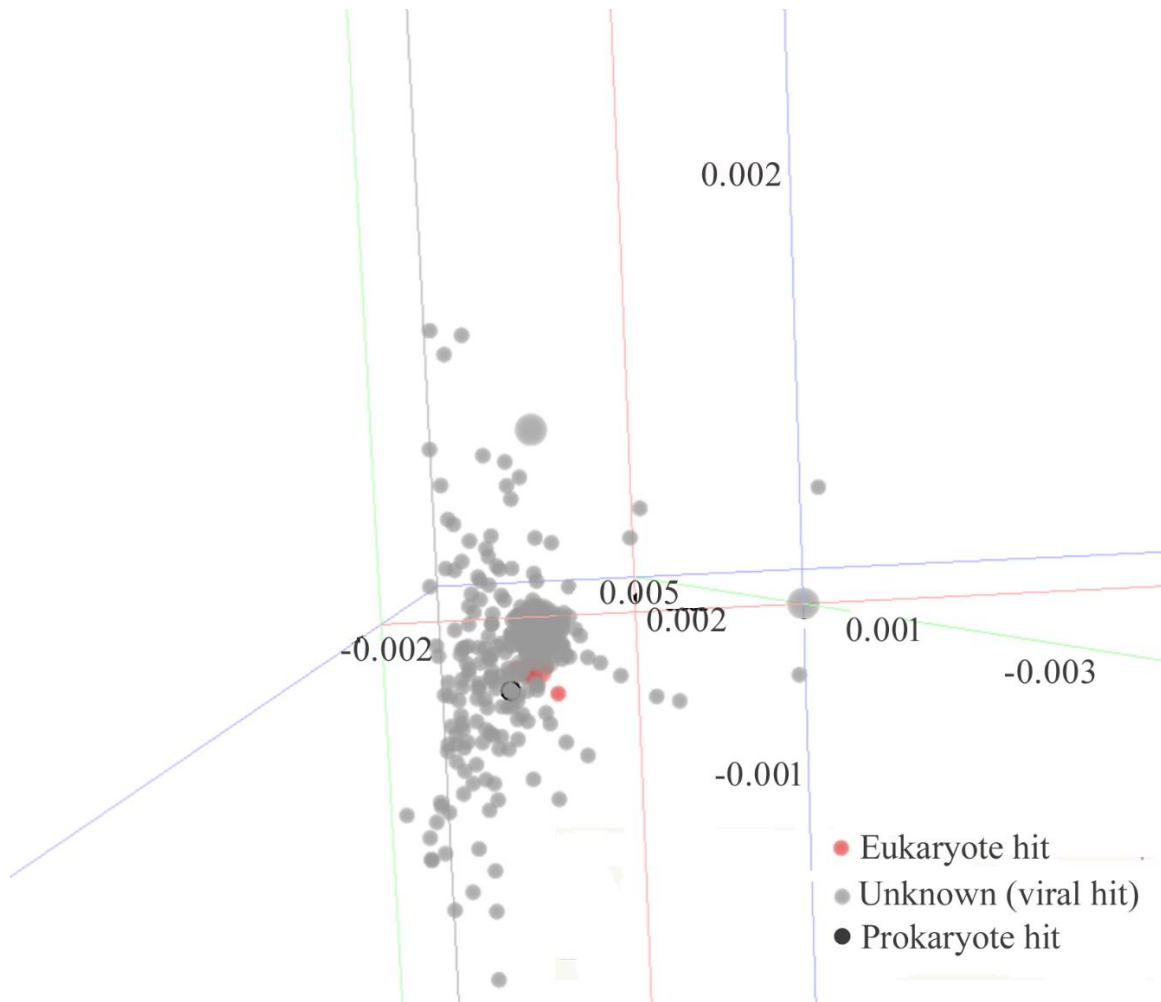

**Supplementary Figure 6: Decontamination of genomic data of single amplified viral genomes.** Decontamination was done by a semi-automatic approach by combining the use of the ProDeGe pipeline<sup>2</sup> and a thorough manual decontamination by BLASTx and BLASTn against the nr database. Detected contaminant contigs (typically <1kb length) were removed and the remained putative viral genome fragments were screened with ProDeGe pipeline and the results of the principal component analyses is shown. ProDeGe bins kmers (5-mers and 9-mers) generated from cleaned vSAGs and compare them by BLAST against nr Genbank database. Nearly all cleaned putative viral genome fragments were of unknown origin, taxonomically not related to prokaryotes. Each dot is a putative viral genome fragment. Color of dot indicates the putative taxonomic affiliation of the best hit kmers generated from vSAGS with the nr Genbank database.

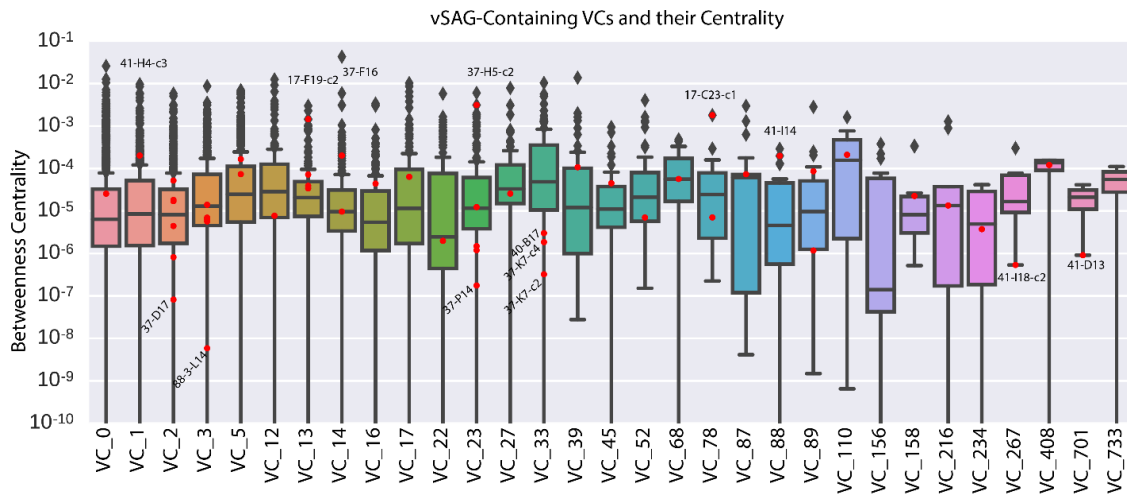

**Supplementary Fig. 7. Relatedness of vSAGs with the Global Oceanic Virome clusters described in this study (Supplementary Table 3).** Figure illustrates the centrality and frequency of connections between vSAGs and viral clusters (VCs, X-axis). Low betweenness values (Y-axis) correspond to fewer/weaker connections with VCs, with higher values being more-connected sequences. Each box represents 95% confidence intervals, with average score centrality within VCs denoted by a line in the box. vSAGs outliers (in red) below average score centrality could represent new genera. Although application of viral taxonomy criteria to define viral species and genera remains complicated to uncultured viruses, in this study we have used the following criteria based on a previous study by Roix and colleagues<sup>4</sup>. New genera are defined when the vSAGs presented weaker connections with closest viral relatives within the global marine viral network, as previously described<sup>4</sup>. New viral species are defined when  $\leq 95\%$  of nucleotide identity was obtained with the closest viral relative.



vSAG 30-E13, North Atlantic (4,000 m depth; Malaspina Expedition)

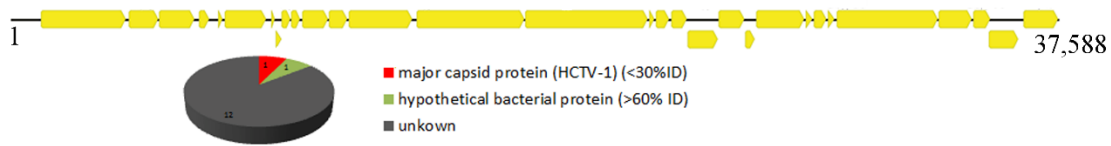

vSAG 88-3\_L14, North Atlantic (4,000 m depth; Malaspina Expedition)

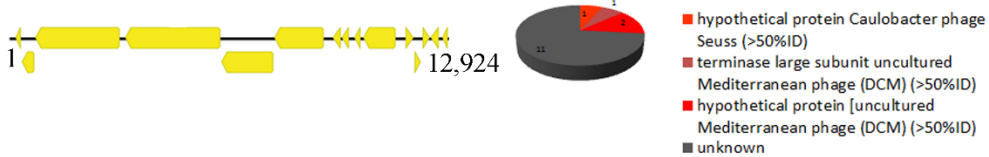

vSAG 30-J17, North Atlantic (4,000 m depth; Malaspina Expedition)

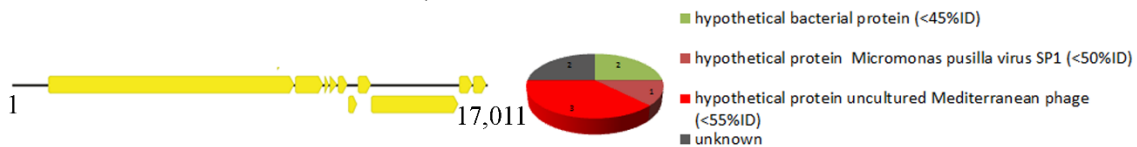

**Supplementary Figure 8: Single amplified viral genomes obtained from the deep ocean.** Genome annotation of three vSAGs from the North Atlantic. Prediction of open reading frames (ORFs) were done with Genmark with heuristic model optimized for viruses<sup>3,4</sup>. Comparison with BLASTp of predicted ORFs was carried out with non-redundant Genbank and viral fosmids from mesopelagic and bathypelagic samples of the Mediterranean Sea<sup>5</sup>. Conserved domains of predicted proteins were searched<sup>6</sup>.

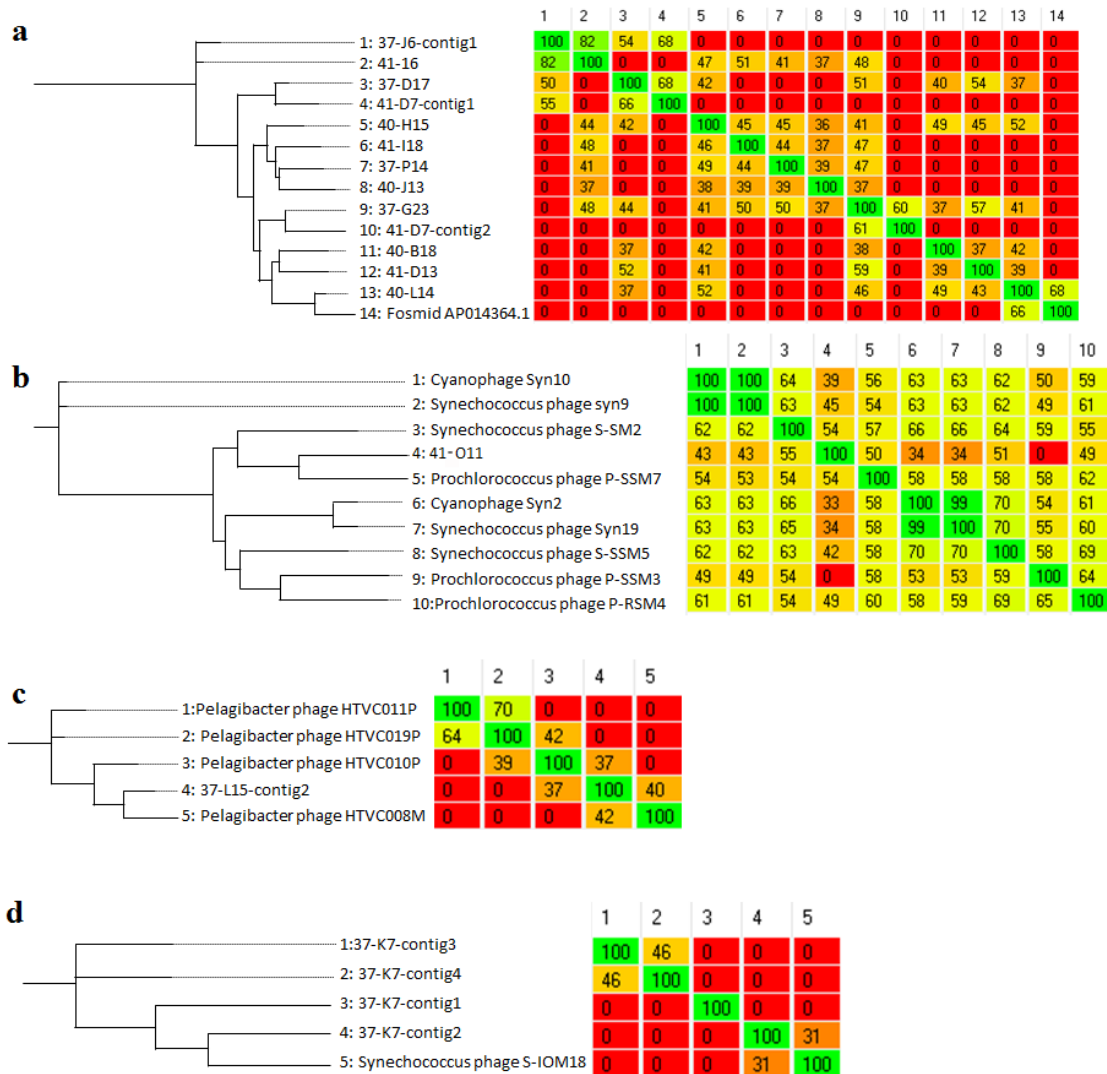

**Supplementary Figure 9: Comparative genome analyses based on average nucleotide identity (ANI).** (a-d) Different heat maps calculated using Gegenees 2.2.1 software showing the genetic relatedness (ANI values) within the obtained vSAGs (a), and with other marine viral groups (b-d). The trees were constructed with SplitsTree using the neighbor joining method.

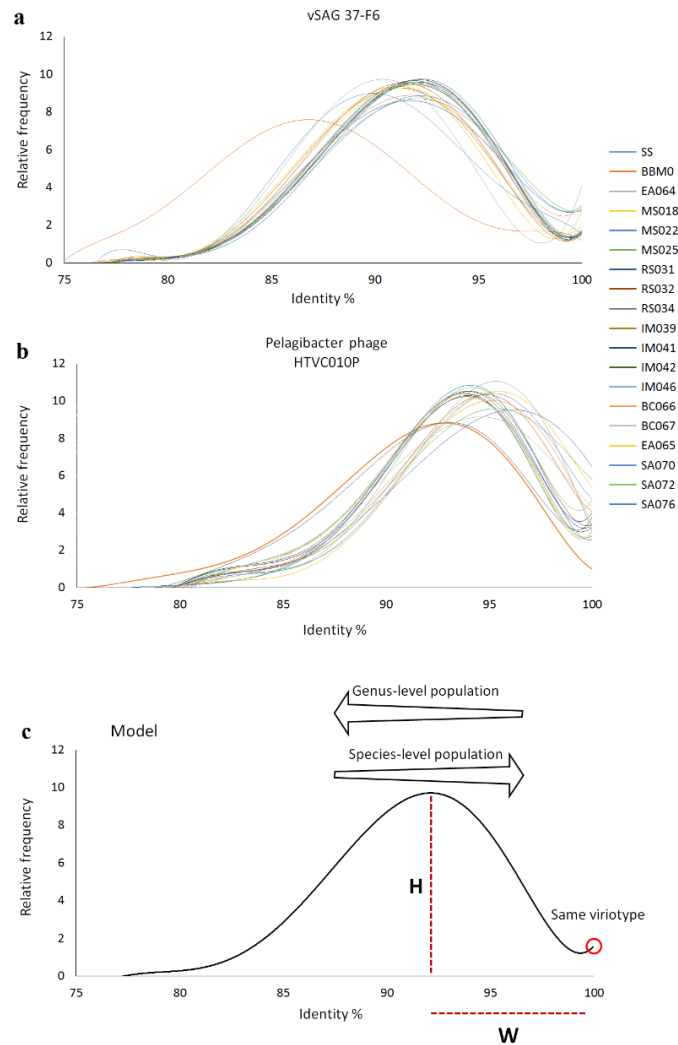

**Supplementary Figure 10: Specific-species pattern of viral population of reference viruses in marine environments.** (a) Viral population structure of the virus 37-F6 and (b) the reference abundant *Pelagibacter* phage in over twenty viromes spanning nearly all oceanic regions. List of abbreviations of viromes as in Fig. 2. Appended numbers refer to the *Tara* metavirome sample nomenclature previously used<sup>7</sup>. Notice that the structure of viral population of virus 37-F6 from the same sampling point (Blanes, Mediterranean Sea) is slightly different than the rest of oceanic regions and based on our proposed model depicted in panel C and supplementary text, it is likely more (micro-)diverse in the sampling point than in other regions. (c) Proposed model of viral population structure based on metagenomics recruitment inspired by that previously described for prokaryotes<sup>8</sup>. Notice that in contrast to prokaryotes, a genetic discontinuity is not observed between 90-95% of identity but is rather a continuous line with a clear peak precisely in that identity range. None of vSAGs, virus isolates, fosmids and viral contigs recruited reads below 75% identity. Furthermore, a secondary peak observed in prokaryotes at the level of <90% identity is not observed either. Red arrows and dots

depict the biological meaning of recruited viromic reads. H, height of the curve. W, half of the width of the curve.

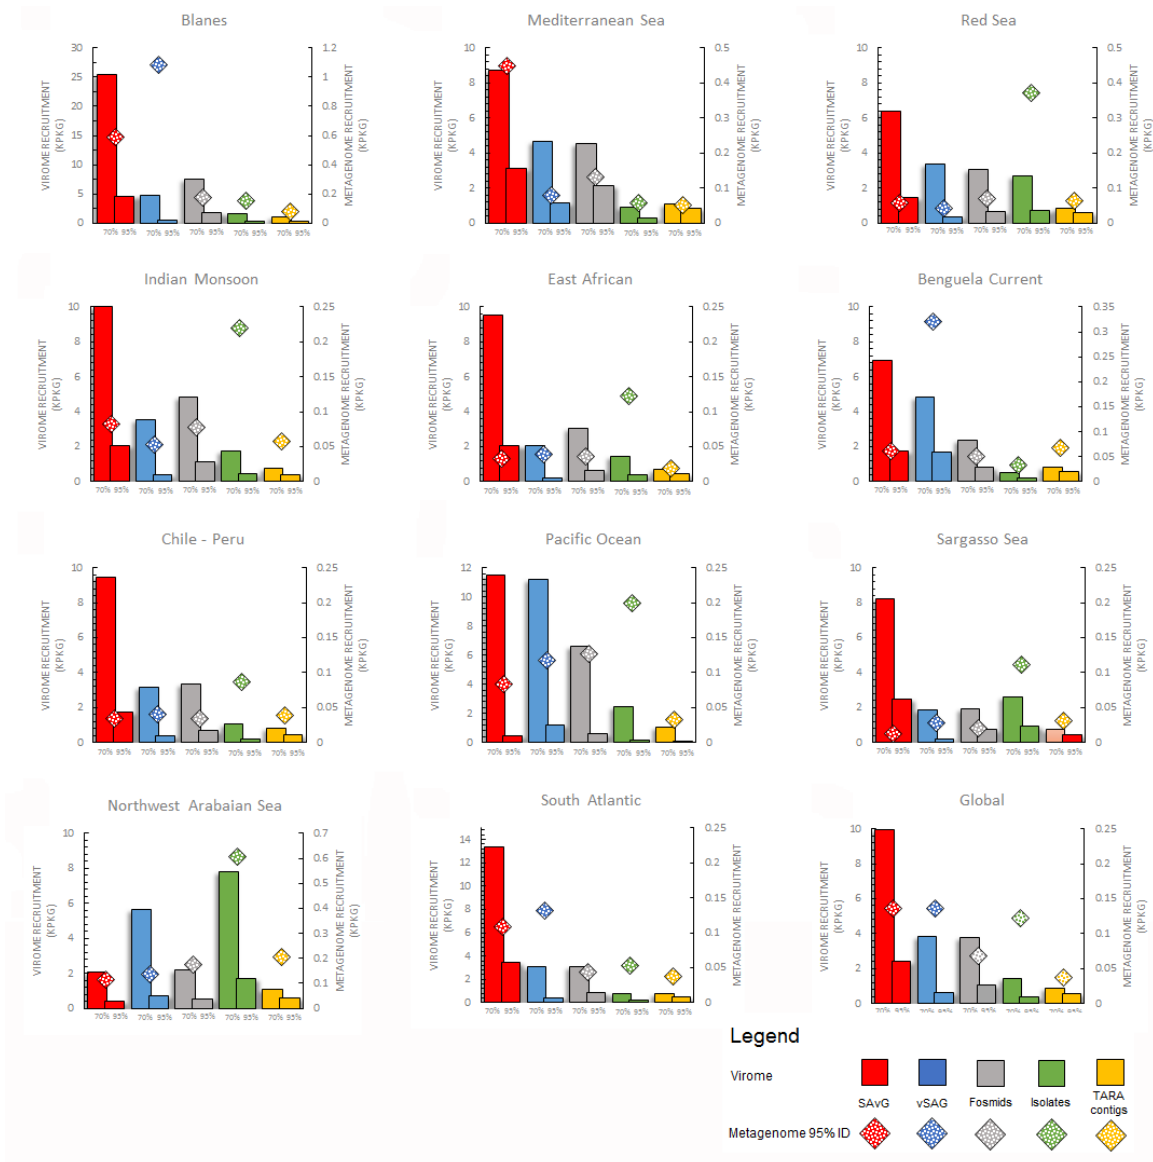

**Supplementary Fig. 11. Abundance of viral genome datasets in the different analyzed regions.** Virome recruitment (in columns) with different identity thresholds ( $\geq 70$  and  $\geq 95\%$ ). Microbial metagenomic recruitment rate (diamonds) results with an identity threshold of  $\geq 95\%$ . The vSAG dataset showed the highest recruitment rate expressed in recruited kb per kb viral genome per Gb of virome (KPKG) in most of the analyzed viromes, but no significant differences in the microbial metagenomics recruitment were observed among the viral genome datasets.

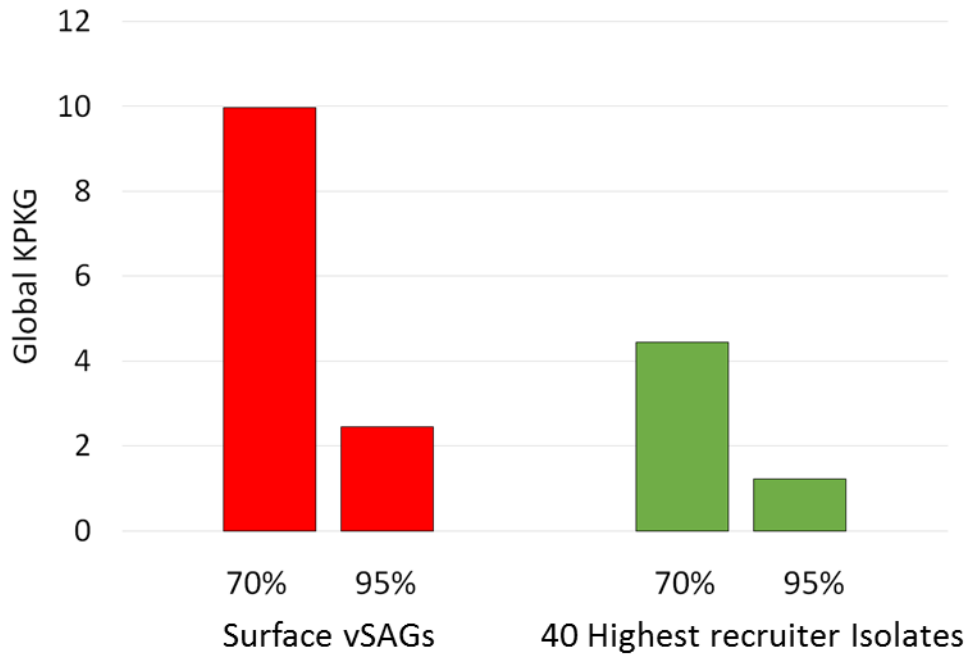

**Supplementary Figure 12: Virome recruitment rate of vSAGs compared to the 40 most abundant virus isolates at the global scale.** We used two identity thresholds ( $\geq 70$  and  $\geq 95\%$ ). In this analysis, we biased in purpose the comparison by considering only those 40 virus isolates with the highest recruitment rate in the surface virosphere. Even in that scenario, the relative recruitment rate of vSAG was higher.

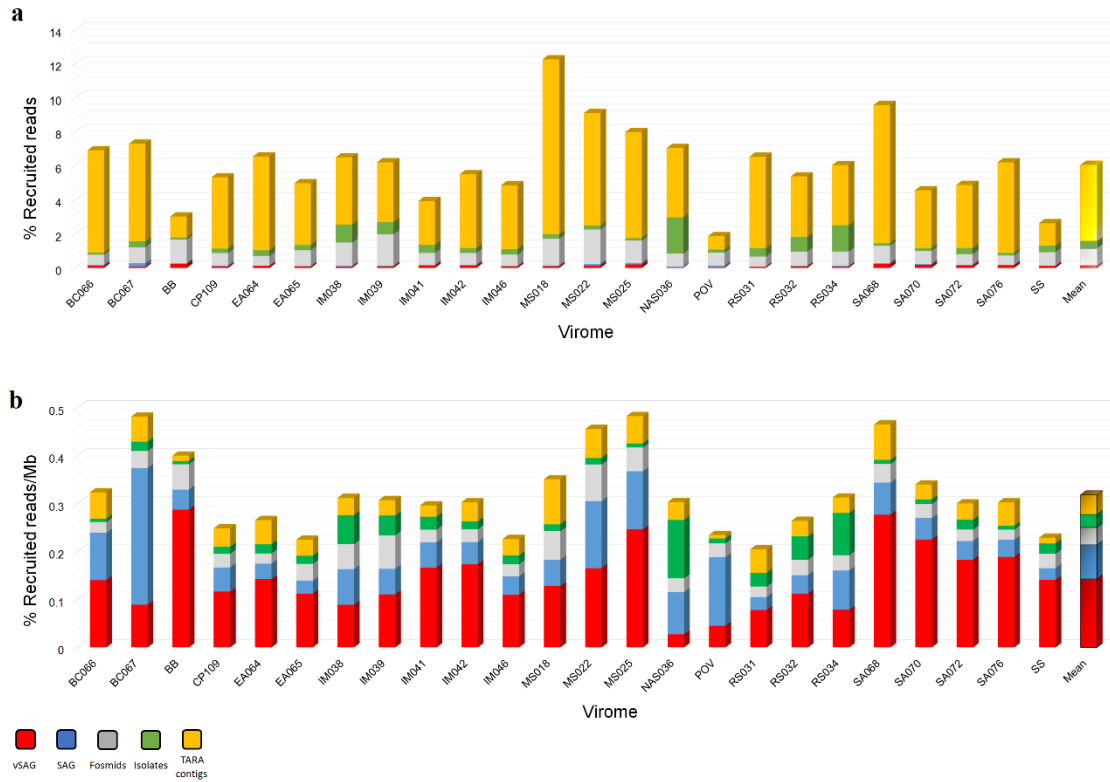

**Supplementary Figure 13: Reads recruited for each viral genomic dataset ( $\geq 95\%$  cut-off identity). (a) Non-normalized viromic recruitment results. (b) Normalized viromic recruitment results considering the size of the viral genomic dataset.**

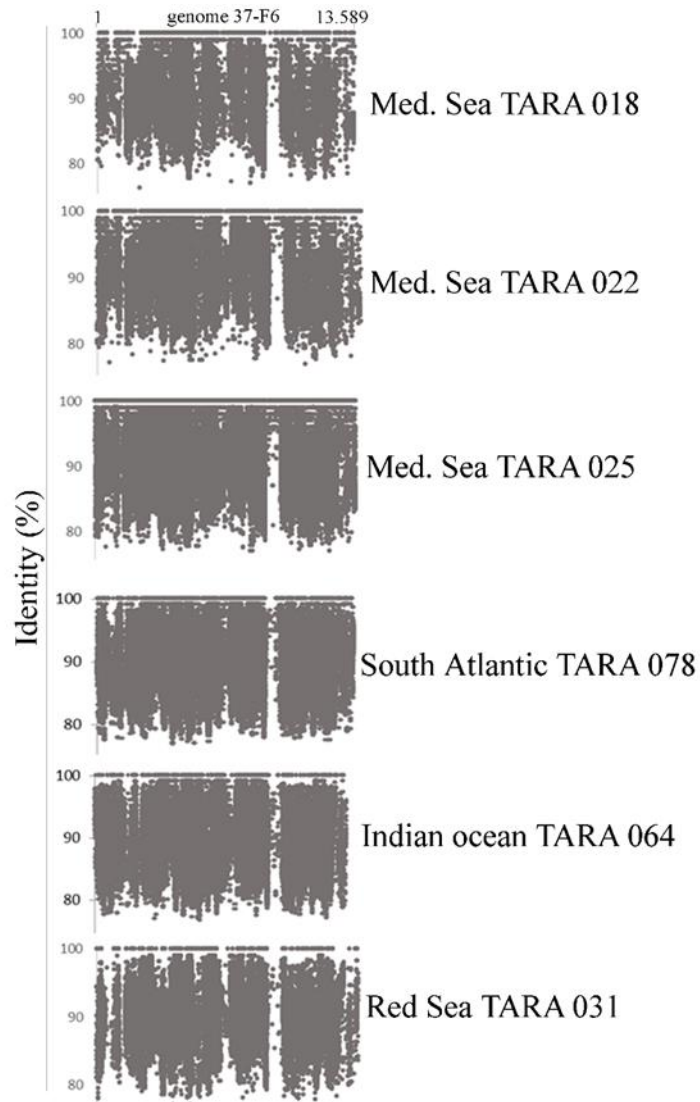

**Supplementary Fig. 14. Virome fragment recruitment of the vSAG 37-F6.** Virome fragment recruitment in the Indian and the South Atlantic oceans and the Red Sea from *Tara* expedition samples collected several thousand kilometers away from the sampling point of the vSAG 37-F6 (NW Mediterranean, Blanes Bay Microbial Observatory). Note that the genomic island of viruses is almost fully covered in *Tara* Mediterranean viromes from the Western Mediterranean Sea, geographically near to Blanes Bay Microbial Observatory.



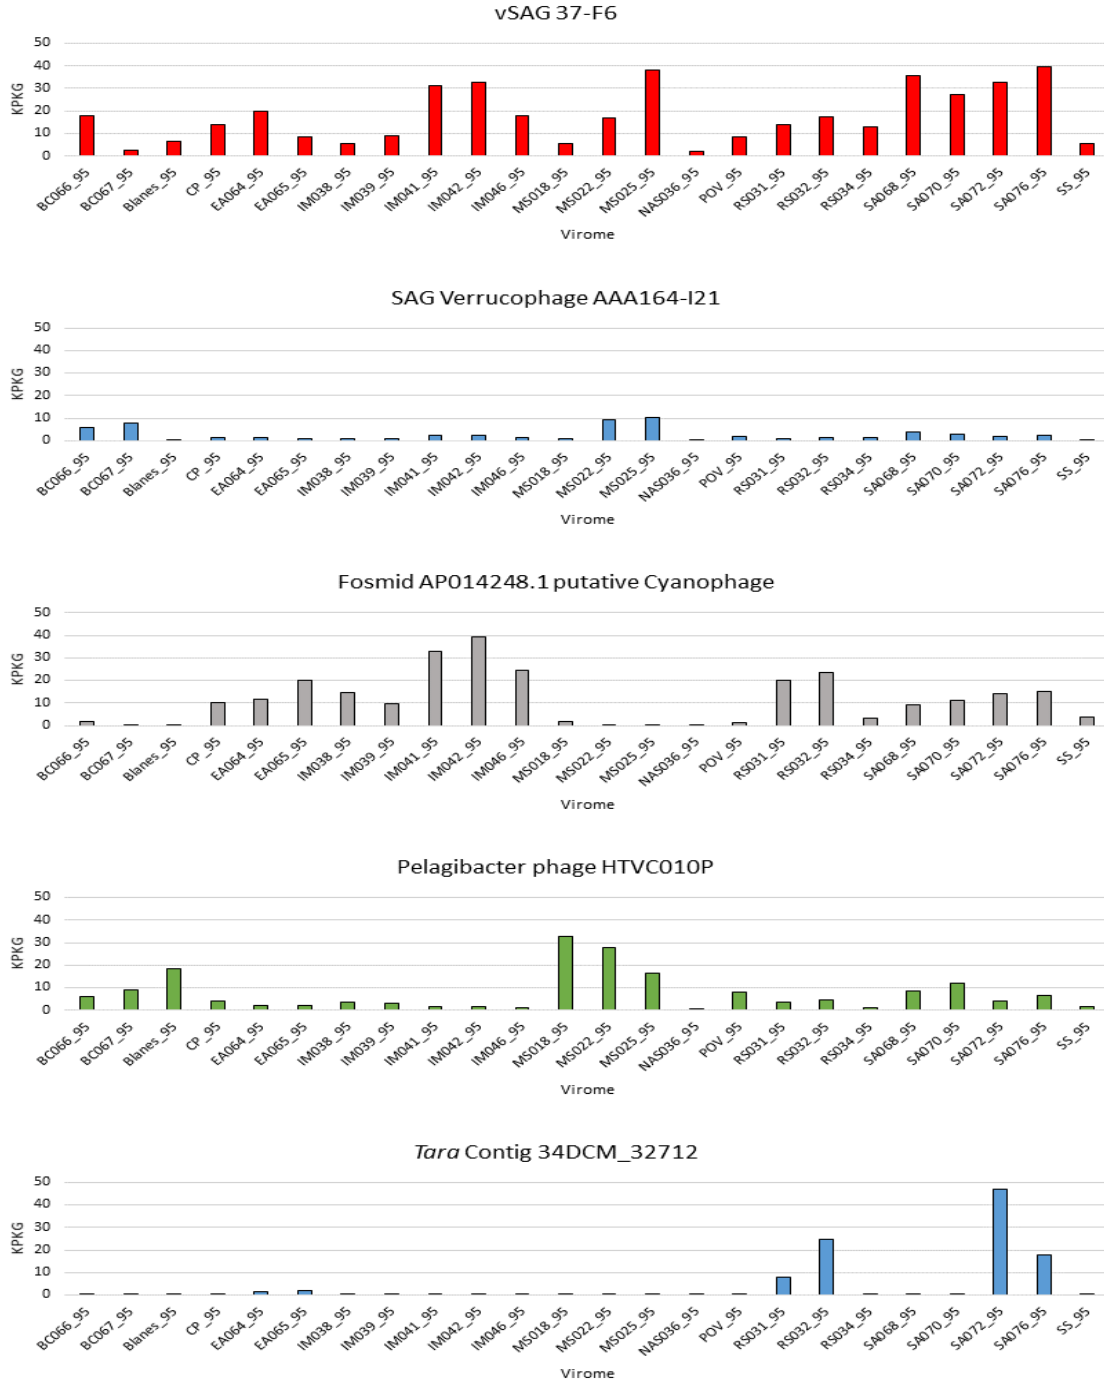

**Supplementary Figure 15: Abundance distribution of the most abundant marine viruses.** The abundance of the most abundant surface dsDNA viruses for each virus genome datasets according to the procedure for genome recovering (single-virus genomics (37-F6), viruses from single bacterial cells<sup>9</sup> (Verrucophage AAA164-I21), virus cloned in fosmids<sup>10</sup> (AP014248. putative Cyanophage), virus isolates (Pelagibacter phage HTVC010P) and viromics from *Tara* Oceans dataset<sup>11,7</sup> (34DCM\_32712), in all viromes. Fragment recruitment data was used to stimate the overall abundance for each region. Abundance is represented in KPKG (as in Fig. 2).

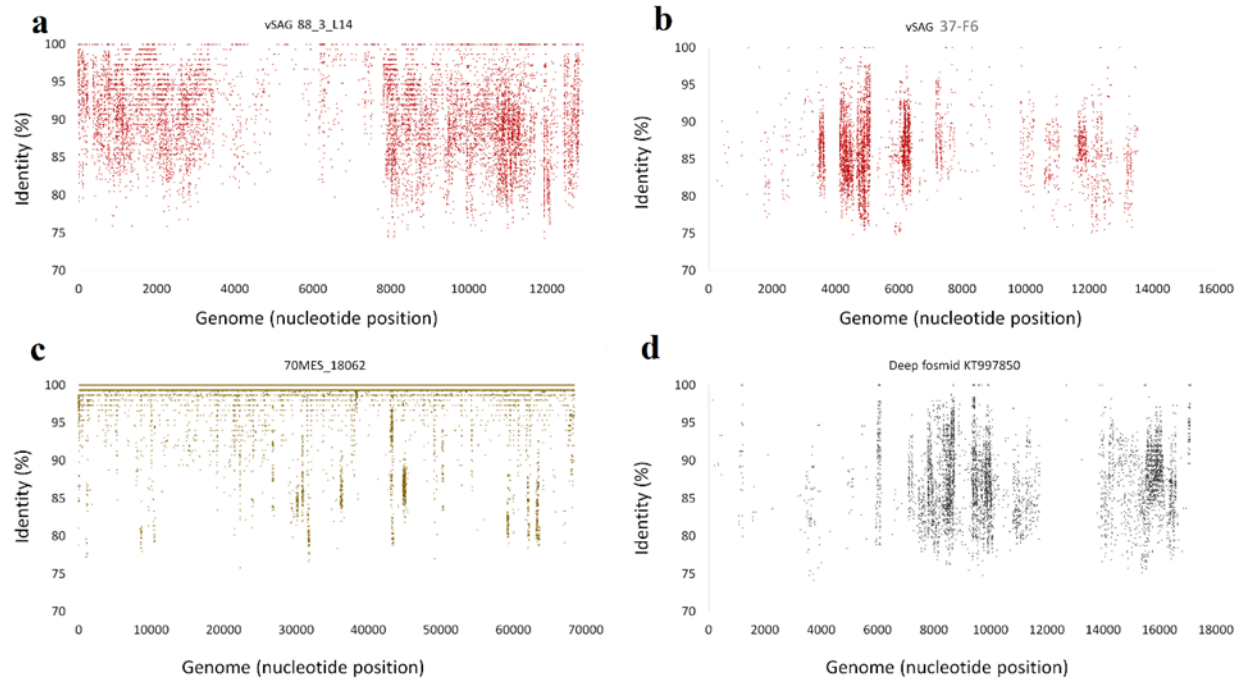

**Supplementary Fig. 16. Deep viromic fragment recruitment.** Fragment virome recruitment plots from the North Atlantic bathypelagic region (4000 m depth; sample MSP131 from the *Malaspina* Expedition<sup>11</sup>). (a-d) Recruitment of the deep vSAG 88-3-L14 was compared with the abundant surface vSAG 37-F6 and those most abundant genome fragments recovered by viromics and cloning in fosmids: *Tara* contig 70\_MES\_18062 and viral fosmid KT997850<sup>5</sup>.

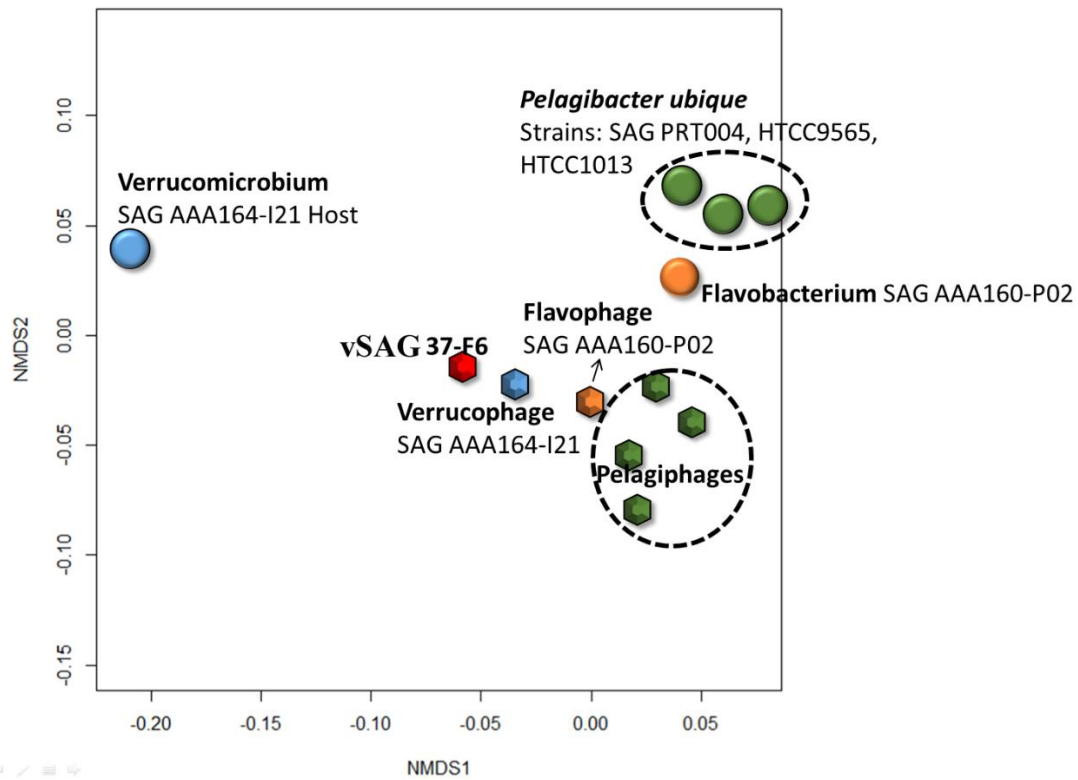

**Supplementary Figure 17: Tentative assignment of viruses to hosts according to tetranucleotide frequency signatures.** Non-metric MDA of tetranucleotide frequency show the degree of similarity between the different phages and their host with the vSAG 37-F6. Tetranucleotide frequency were calculated with the publicly available bioinformatics tool at the following link: <http://mobyli.pasteur.fr/cgi-bin/portal.py#forms::compseq>

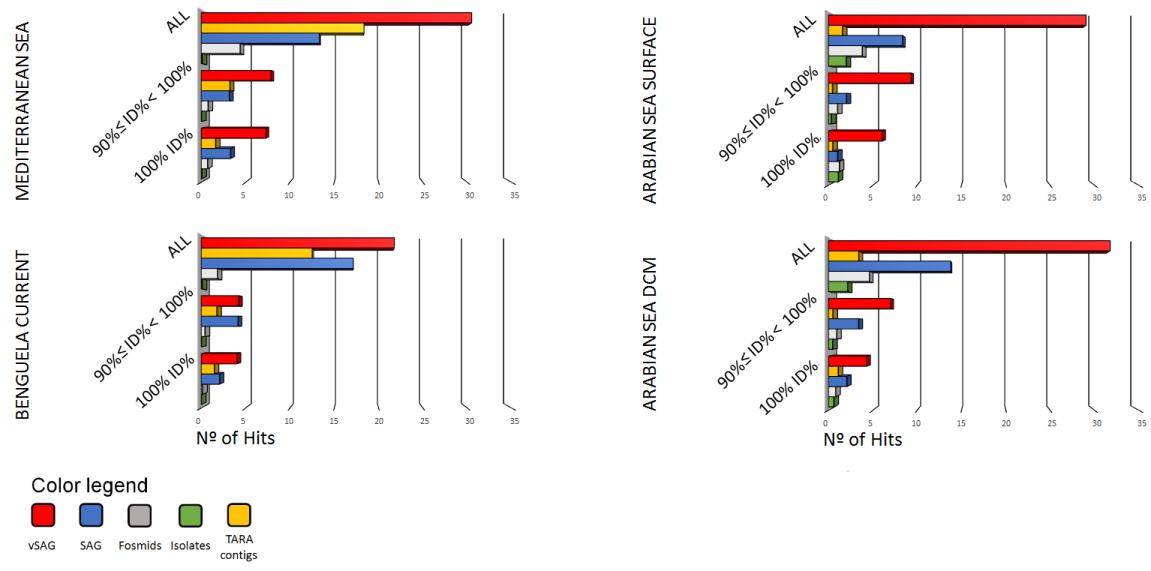

**Supplementary Fig. 18. Peptide recruitment for each viral genomic dataset using predicted peptide sequences obtained from *Tara expedition*<sup>12</sup>. Different cut-off identities were used (no cut off,  $\geq 90$  but  $< 100\%$ , and  $100\%$ ). In all four metaproteomes, vSAGs are the most peptide recruiters.**

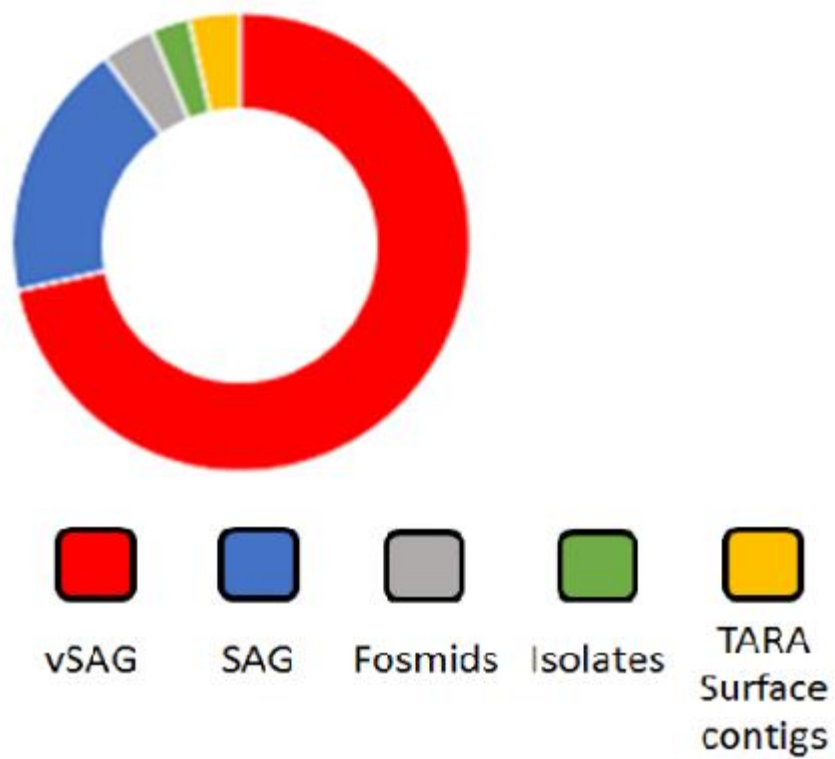

**Supplementary Fig. 19. Peptide recruitment (100% identity) for each viral genomic dataset using the predicted peptide sequences obtained in the Oregon Coast<sup>13</sup>.**

**a**

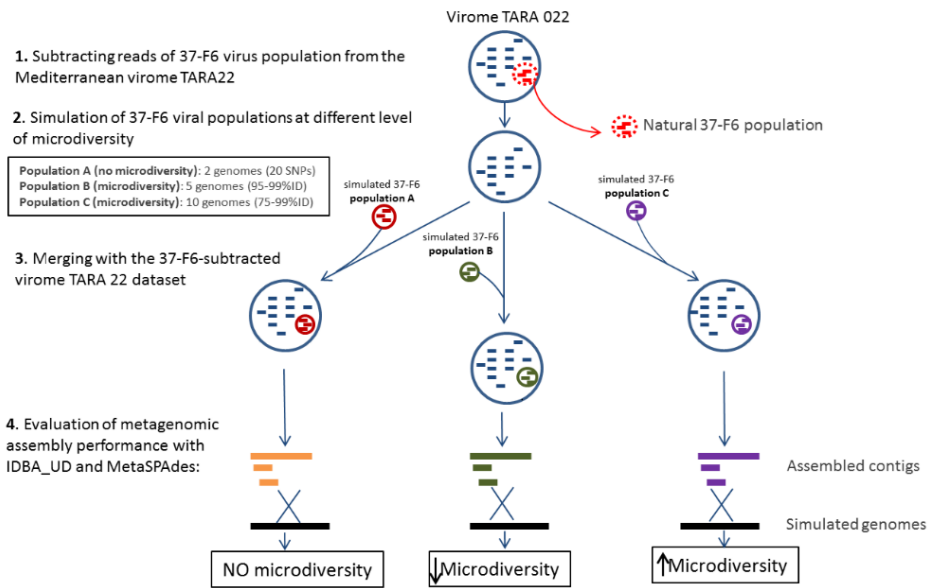

**b**

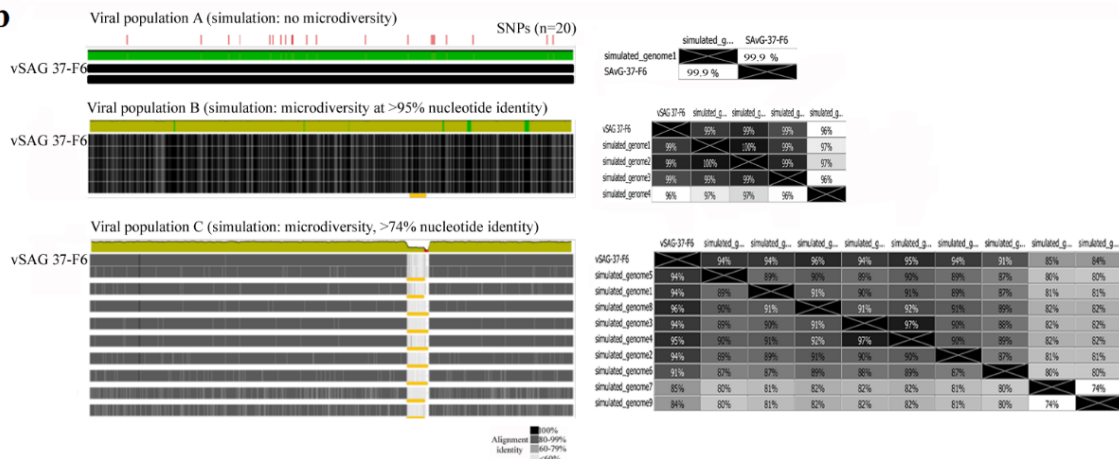

**c**

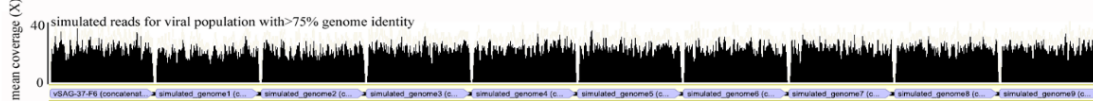

**d**

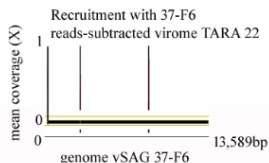

**e**

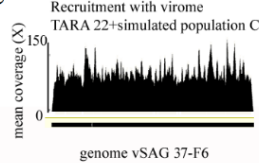

**Supplementary Fig. 20. Employed methodology to assess the effect of (micro-)diversity on the metagenomics viral assembly (a)** Schematic diagram illustrating the employed methodology to evaluate the metagenomic assembly performance of assemblers to reconstruct the viral genome from populations with different degrees of diversity and microdiversity within a natural virome. First, raw reads from vSAG 37-F6 were removed from *Tara* virome MS022 (see panel d). Then, simulated reads from the

three populations with different level of microdiversity were introduced within *Tara* virome MS022 (see panels b and c). **(b)** Three viral populations of vSAG 37-F6 were simulated (see Methods for details). Population A: no microdiversity; population B: low microdiverse; and population C: medium-high microdiverse. **(c)** For each population, Illumina raw reads were generated (see Methods) to simulate the viral populations. Read mapping of those simulated reads against the reference simulated genomes of vSAG at different microdiversity degrees confirmed that all genomes had at least a genome coverage of 40X. For convenience, only the simulation and mapping of reads is shown for the population C. **(d)** Reads corresponding for the vSAG population 37-F6 were removed from virome *Tara* MS022. **(e)** Mapping of simulated virome *Tara* MS022 with the introduced population C of vSAG 37-F6 confirmed that raw reads mapped with high coverage against the reference simulated genomes. For convenience, only data is shown for the population C.

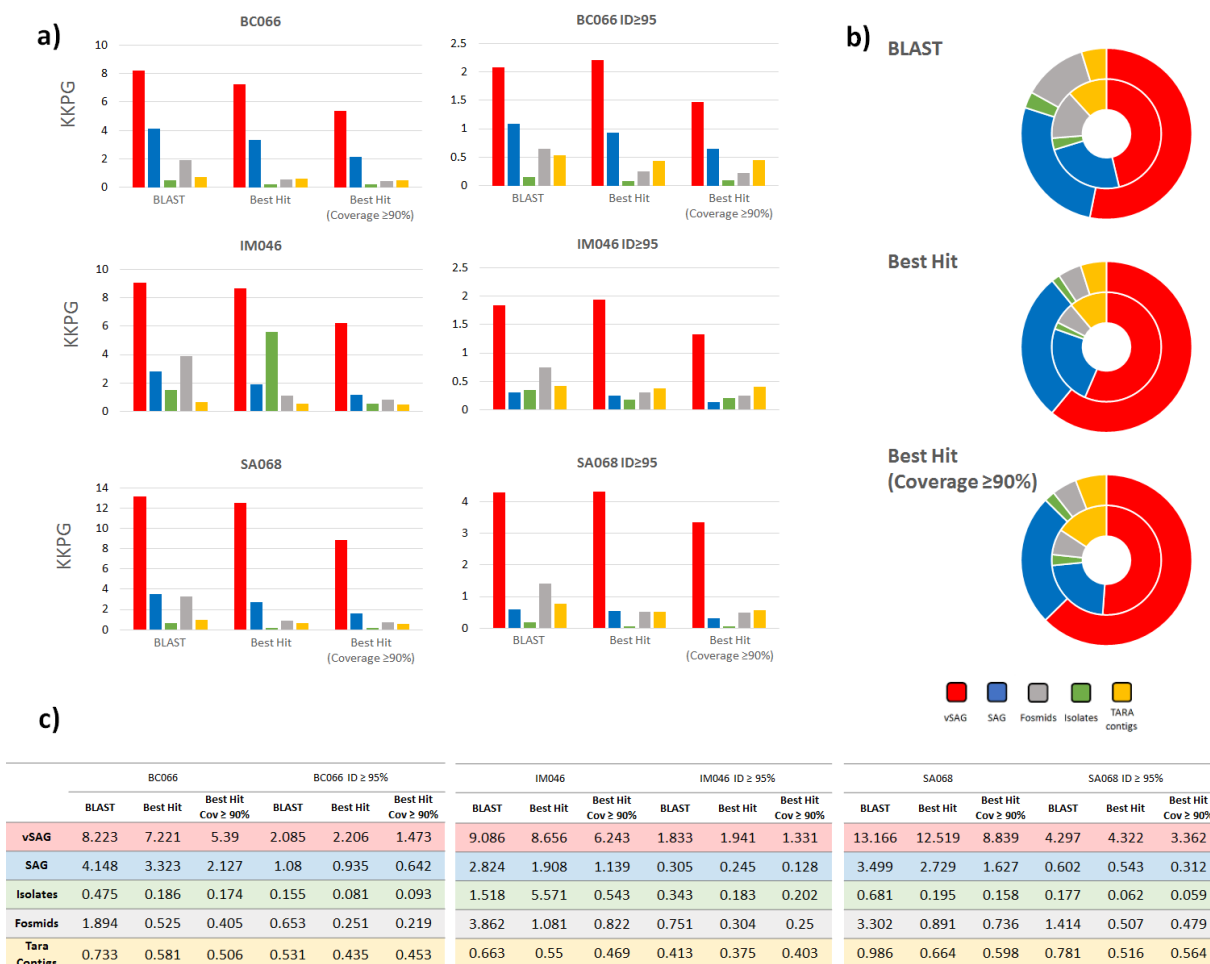

**Supplementary Fig. 21. Comparison of different algorithms for metagenomic fragment recruitment.** We compared the method that we used in our metagenomic fragment recruitment (**Fig. 2**) previously used by other authors<sup>10</sup> with the reciprocal-best hit fragment recruitment employed in the study of Pelagibacter phages<sup>14</sup>. Best-hit fragment recruitment was carried out with the Enveomics bioinformatic package (<https://peerj.com/preprints/1900/>) as described. Two fragment recruitment variants were also tested: without query coverage filtering and applying 90% of query coverage cut-off. **a)** Fragment recruitment with three different viromes are shown, Benguela Current (BC066), Indian Monsoon (IM046), and Southern Atlantic (SA068), using a 70% and 95% Identity cut-off. **b)** Relative fragment recruitment with Benguela Current virome (BC066). **c)** Data of the three recruitments. Overall, data indicate that no differences were observed among recruiter strategies.



## Supplementary Tables

**Supplementary Table 1. Sequencing results and assembly for the marine vSAGs**

| vSAG            | Sample <sup>a</sup> | Treatment <sup>b</sup> | Contigs         | GC%   | Sequence Length (bp) |
|-----------------|---------------------|------------------------|-----------------|-------|----------------------|
| <b>17-C23</b>   | 1                   | A                      | 17-C23-contig1  | 35.10 | 78,637               |
|                 |                     |                        | 17-C23-contig2  | 39.00 | 7,850                |
| <b>17-D16</b>   | 1                   | A                      | 17-D16          | 30.30 | 12,025               |
| <b>17-D19</b>   | 1                   | A                      | 17-D19-contig1  | 34.10 | 7,108                |
|                 |                     |                        | 17-D19-contig20 | 35.00 | 14,151               |
| <b>17-E11</b> * | 1                   | A                      | 17-E11          | 36.30 | 6,957                |
| <b>17-E15</b>   | 1                   | A                      | 17-E15          | 34.60 | 33,035               |
| <b>17-F13</b>   | 1                   | A                      | 17-F13          | 38.40 | 33,869               |
|                 |                     |                        | 17-F19-contig1  | 36.30 | 15,706               |
| <b>17-F19</b>   | 1                   | A                      | 17-F19-contig2  | 35.80 | 2,525                |
|                 |                     |                        | 17-F19-contig3  | 35.90 | 2,236                |
|                 |                     |                        | 17-G23-contig1  | 32.40 | 7,276                |
| <b>17-G23</b>   | 1                   | A                      | 17-G23-contig2  | 32.60 | 11,351               |
|                 |                     |                        | 37-D17          | 34.20 | 8,248                |
| <b>37-F6</b> *  | 2                   | B                      | 37-F6           | 38.20 | 13,589               |
| <b>37-F16</b>   | 2                   | B                      | 37-F16          | 30.90 | 58,722               |
| <b>37-G23</b>   | 2                   | B                      | 37-G23          | 36.00 | 11,565               |
| <b>37-H5</b>    | 2                   | B                      | 37-H5-contig1   | 37.60 | 25,858               |
|                 |                     |                        | 37-H5-contig2   | 39.50 | 18,835               |
| <b>37-I21</b> * | 2                   | B                      | 37-I21          | 36.10 | 31,959               |
| <b>37-J6</b>    | 2                   | B                      | 37-J6-contig1   | 33.70 | 23,751               |
|                 |                     |                        | 37-J6-contig2   | 32.80 | 6,530                |
| <b>37-K7</b>    | 2                   | B                      | 37-K7-contig1   | 35.10 | 2,871                |
|                 |                     |                        | 37-K7-contig2   | 35.90 | 10,586               |
|                 |                     |                        | 37-K7-contig3   | 37.80 | 8,957                |
|                 |                     |                        | 37-K7-contig4   | 35.00 | 8,189                |
| <b>37-K11</b>   | 2                   | B                      | 37-K11          | 34.50 | 13,098               |
|                 |                     |                        | 37-L15-contig1  | 31.70 | 16,494               |
| <b>37-L15</b> * | 2                   | B                      | 37-L15-contig2  | 34.00 | 13,846               |
|                 |                     |                        | 37-L15-contig3  | 30.20 | 2,160                |
|                 |                     |                        | 37-M8           | 36.50 | 10,162               |
| <b>37-M19</b>   | 2                   | B                      | 37-M19          | 35.20 | 20,541               |
| <b>37-P14</b>   | 2                   | B                      | 37-P14          | 35.90 | 7,161                |
| <b>40-A23</b>   | 2                   | B                      | 40-A23          | 36.90 | 4,388                |
| <b>40-B17</b>   | 2                   | B                      | 40-B17          | 33.50 | 5,502                |
| <b>40-B18</b>   | 2                   | B                      | 40-B18          | 38.20 | 20,323               |
| <b>40-D19</b>   | 2                   | B                      | 40-D19          | 33.50 | 23,628               |
| <b>40-H15</b>   | 2                   | B                      | 40-H15          | 33.70 | 7,577                |
| <b>40-J13</b>   | 2                   | B                      | 40-J13          | 44.50 | 4,380                |

|                 |   |   |                |       |        |
|-----------------|---|---|----------------|-------|--------|
| <b>40-L14</b>   | 2 | B | 40-L14         | 37.70 | 8,282  |
| <b>40-P19</b>   | 2 | B | 40-P19         | 31.20 | 6,640  |
| <b>41-A4</b>    | 2 | C | 41-A4-contig1  | 36.80 | 13,834 |
|                 |   |   | 41-A4-contig2  | 37.80 | 18,697 |
| <b>41-D7*</b>   | 2 | C | 41-D7-contig1  | 32.60 | 24,030 |
|                 |   |   | 41-D7-contig2  | 34.00 | 14,432 |
| <b>41-D13</b>   | 2 | C | 41-D13         | 32.80 | 6,045  |
|                 |   |   | 41-H4-contig1  | 28.50 | 36,279 |
| <b>41-H4</b>    | 2 | C | 41-H4-contig2  | 29.60 | 17,198 |
|                 |   |   | 41-H4-contig3  | 29.20 | 10,721 |
|                 |   |   | 41-H16         | 39.20 | 11,145 |
| <b>41-H17</b>   | 2 | C | 41-H17         | 35.50 | 6,664  |
| <b>41-I9</b>    | 2 | C | 41-I9          | 31.20 | 4,913  |
| <b>41-I14</b>   | 2 | C | 41-I14         | 36.20 | 28,554 |
| <b>41-I16</b>   | 2 | C | 41-I16         | 34.10 | 7,028  |
| <b>41-I18</b>   | 2 | C | 41-I18-contig1 | 36.30 | 8,360  |
|                 |   |   | 41-I18-contig2 | 34.20 | 8,389  |
| <b>41-O11</b>   | 2 | C | 41-O11         | 37.20 | 14,512 |
| <b>80-3-I13</b> | 3 | B | 80-3-I13       | 36.60 | 22,966 |
| <b>30-E13</b>   | 4 | E | 30-E13         | 44.50 | 37,588 |
| <b>30-J17</b>   | 4 | E | 30-J17         | 32.90 | 17,011 |
| <b>88-3-L14</b> | 5 | E | 88-3-L14       | 37.20 | 12,924 |

\*Two different sequencing were done, using Nextera and True Seq;

<sup>a</sup>Sample: 1=Mediterranean Sea, Barceloneta Beach; 2=Mediterranean Sea, Blanes Bay Microbial Observatory; 3=Mediterranean Sea DCM; 4=North Atlantic Ocean, Malaspina expedition sample 134; 5=North Atlantic Ocean, Malaspina expedition sample 131Treatment<sup>b</sup>: A=fixed sample+liquid N<sub>2</sub> and KOH (pH14) shock; B=unfixed sample+liquid N<sub>2</sub> and KOH (pH=14) shock; C=unfixed sample+KOH (pH=14) shock.; E=cryopreserved in GlyTE+treatment B

**Supplementary Table 2: Relatedness of vSAGs with the Global Oceanic Viral Clusters <sup>11</sup> and tentative taxonomy prediction based on gene-content network analysis (see methods for details)**

| Sequence       | vSAG   | Closest VC (this study) | VC Size | GOV VC (Roux et al, 2016) | No. of GOV | No. of vSAGs | References | Order*            | Family*           | Genus*            |
|----------------|--------|-------------------------|---------|---------------------------|------------|--------------|------------|-------------------|-------------------|-------------------|
| 17-C23-contig1 | 17-C23 | VC_0078                 | 34      | VC_0434                   | 20         | 2            | 12         | Caudovirales (12) | Siphoviridae (12) | T5 like virus (8) |
| 17-C23-contig2 | 17-C23 |                         |         |                           |            |              |            |                   |                   |                   |
| 17-D16         | 17-D16 | VC_0234                 | 8       | VC_0446                   | 7          | 1            | 0          |                   |                   |                   |
| 17-D19-contig1 | 17-D19 | VC_0003                 | 626     | VC_0006                   | 616        | 6            | 0          |                   |                   |                   |
| 17-D19-contig2 | 17-D19 | VC_0003                 | 626     | VC_0006                   | 616        | 6            | 0          |                   |                   |                   |
| 17-E11         | 17-E11 | VC_0005                 | 467     | VC_0008                   | 461        | 3            | 0          |                   |                   |                   |
| 17-E15         | 17-E15 | VC_0408                 | 4       | VC_1116                   | 3          | 1            | 0          |                   |                   |                   |
| 17-F13         | 17-F13 | VC_0156                 | 14      | VC_0303                   | 13         | 1            | 0          |                   |                   |                   |
| 17-F19-contig1 | 17-F19 | VC_0013                 | 205     | VC_0019                   | 199        | 5            | 1          | Caudovirales (1)  | Podoviridae (1)   |                   |
| 17-F19-contig2 | 17-F19 | VC_0013                 | 205     | VC_0019                   | 199        | 5            | 1          |                   |                   |                   |
| 17-F19-contig3 | 17-F19 |                         |         |                           |            |              |            |                   |                   |                   |
| 17-G23-contig1 | 17-G23 | VC_0052                 | 58      | VC_0095                   | 57         | 1            | 0          |                   |                   |                   |
| 17-G23-contig2 | 17-G23 | VC_0158                 | 14      | VC_0281                   | 13         | 1            | 0          |                   |                   |                   |
| 30-E13         | 30-E13 | VC_0087                 | 30      | VC_0165                   | 28         | 1            | 1          | Caudovirales (1)  | Siphoviridae (1)  |                   |
| 30-J17         | 30-J17 | VC_0110                 | 23      | VC_0143                   | 22         | 1            | 0          |                   |                   |                   |
| 37-D17         | 37-D17 | VC_0002                 | 678     | VC_0005                   | 665        | 7            | 5          | Caudovirales (5)  | Podoviridae (5)   |                   |
| 37-F16         | 37-F16 | VC_0014                 | 195     | VC_0031                   | 190        | 2            | 1          | Caudovirales (1)  | Myoviridae (1)    |                   |
| 37-F6          | 37-F6  | VC_0005                 | 467     | VC_0008                   | 461        | 3            | 0          |                   |                   |                   |
| 37-G23         | 37-G23 | VC_0089                 | 29      | VC_0176                   | 27         | 2            | 0          |                   |                   |                   |
| 37-H5-contig1  | 37-H5  | VC_0013                 | 205     | VC_0019                   | 199        | 5            | 1          | Caudovirales (1)  | Podoviridae (1)   |                   |
| 37-H5-contig2  | 37-H5  | VC_0023                 | 136     | VC_0019                   | 125        | 5            | 1          | Caudovirales (1)  | Podoviridae (1)   |                   |

|                |        |         |      |         |     |   |    |                      |                      |                       |
|----------------|--------|---------|------|---------|-----|---|----|----------------------|----------------------|-----------------------|
| 37-I21         | 37-I21 | VC_0078 | 34   | VC_0434 | 20  | 2 | 12 | Caudovirales<br>(12) | Siphoviridae<br>(12) | T5 like virus<br>(8)  |
| 37-J6-contig1  | 37-J6  | VC_0002 | 678  | VC_0005 | 665 | 7 | 5  | Caudovirales<br>(5)  | Podoviridae<br>(5)   |                       |
| 37-J6-contig2  | 37-J6  | VC_0002 | 678  | VC_0005 | 665 | 7 | 5  |                      |                      |                       |
| 37-K11         | 37-K11 | VC_0022 | 141  | VC_0047 | 138 | 1 | 2  | Caudovirales<br>(1)  | Podoviridae<br>(1)   |                       |
| 37-K7-contig1  | 37-K7  |         |      |         |     |   |    |                      |                      |                       |
| 37-K7-contig2  | 37-K7  | VC_0033 | 102  | VC_0060 | 98  | 3 | 0  |                      |                      |                       |
| 37-K7-contig3  | 37-K7  | VC_0023 | 136  | VC_0019 | 125 | 5 | 1  | Caudovirales<br>(1)  | Podoviridae<br>(1)   |                       |
| 37-K7-contig4  | 37-K7  | VC_0033 | 102  | VC_0060 | 98  | 3 | 0  |                      |                      |                       |
| 37-L15-contig1 | 37-L15 | VC_0013 | 205  | VC_0019 | 199 | 5 | 1  | Caudovirales<br>(1)  | Podoviridae<br>(1)   |                       |
| 37-L15-contig2 | 37-L15 | VC_0068 | 39   | VC_0155 | 12  | 1 | 0  |                      |                      |                       |
| 37-L15-contig3 | 37-L15 |         |      |         |     |   |    |                      |                      |                       |
| 37-M19         | 37-M19 | VC_0039 | 83   | VC_0054 | 82  | 1 | 0  |                      |                      |                       |
| 37-M8          | 37-M8  | VC_0027 | 123  | VC_0067 | 80  | 1 | 0  |                      |                      |                       |
| 37-P14         | 37-P14 | VC_0023 | 136  | VC_0019 | 125 | 5 | 1  | Caudovirales<br>(1)  | Podoviridae<br>(1)   |                       |
| 40-A23         | 40-A23 | VC_0003 | 626  | VC_0006 | 616 | 6 | 0  |                      |                      |                       |
| 40-B17         | 40-B17 | VC_0033 | 102  | VC_0060 | 98  | 3 | 0  |                      |                      |                       |
| 40-B18         | 40-B18 | VC_0017 | 168  | VC_0029 | 167 | 1 | 0  |                      |                      |                       |
| 40-D19         | 40-D19 | VC_0012 | 210  | VC_0027 | 208 | 1 | 0  |                      |                      |                       |
| 40-H15         | 40-H15 | VC_0000 | 1090 | VC_0002 | 970 | 1 | 49 | Caudovirales<br>(48) | Myoviridae<br>(45)   | T4 like virus<br>(18) |
| 40-J13         | 40-J13 | VC_0733 | 2    |         | 1   | 1 | 0  |                      |                      |                       |
| 40-L14         | 40-L14 | VC_0003 | 626  | VC_0006 | 616 | 6 | 0  |                      |                      |                       |
| 40-P19         | 40-P19 | VC_0023 | 136  | VC_0019 | 125 | 5 | 1  | Caudovirales<br>(1)  | Podoviridae<br>(1)   |                       |
| 41-A4-contig1  | 41-A4  | VC_0005 | 467  | VC_0008 | 461 | 3 | 0  |                      |                      |                       |
| 41-A4-contig2  | 41-A4  | VC_0216 | 9    | VC_0384 | 8   | 1 | 0  |                      |                      |                       |
| 41-D13         | 41-D13 | VC_0701 | 2    |         | 1   | 1 | 0  |                      |                      |                       |

|                |          |         |     |         |     |   |   |                     |                    |
|----------------|----------|---------|-----|---------|-----|---|---|---------------------|--------------------|
| 41-D7-contig1  | 41-D7    | VC_0002 | 678 | VC_0005 | 665 | 7 | 5 | Caudovirales<br>(5) | Podoviridae<br>(5) |
| 41-D7-contig2  | 41-D7    | VC_0089 | 29  | VC_0176 | 27  | 2 | 0 |                     |                    |
| 41-H16         | 41-H16   | VC_0023 | 136 | VC_0019 | 125 | 5 | 1 | Caudovirales<br>(1) | Podoviridae<br>(1) |
| 41-H17         | 41-H17   | VC_0003 | 626 | VC_0006 | 616 | 6 | 0 |                     |                    |
| 41-H4-contig1  | 41-H4    | VC_0016 | 193 | VC_0033 | 191 | 1 | 0 |                     |                    |
| 41-H4-contig2  | 41-H4    | VC_0014 | 195 | VC_0031 | 190 | 2 | 1 | Caudovirales<br>(1) | Myoviridae (1)     |
| 41-H4-contig3  | 41-H4    | VC_0001 | 751 | VC_0003 | 750 | 1 | 0 |                     |                    |
| 41-I14         | 41-I14   | VC_0088 | 30  | VC_0171 | 29  | 1 | 0 |                     |                    |
| 41-I16         | 41-I16   | VC_0002 | 678 | VC_0005 | 665 | 7 | 5 | Caudovirales<br>(5) | Podoviridae<br>(5) |
| 41-I18-contig1 | 41-I18   | VC_0013 | 205 | VC_0019 | 199 | 5 | 1 | Caudovirales<br>(1) | Podoviridae<br>(1) |
| 41-I18-contig2 | 41-I18   | VC_0267 | 7   | VC_0525 | 6   | 1 | 0 |                     |                    |
| 41-I9          | 41-I9    | VC_0002 | 678 | VC_0005 | 665 | 7 | 5 | Caudovirales<br>(5) | Podoviridae<br>(5) |
| 41-O11         | 41-O11   | VC_0045 | 68  | VC_0090 | 67  | 1 | 0 |                     |                    |
| 80-3-I13       | 80-3-I13 | VC_0002 | 678 | VC_0005 | 665 | 7 | 5 | Caudovirales<br>(5) | Podoviridae<br>(5) |
| 88-3-L14       | 88-3-L14 | VC_0003 | 626 | VC_0006 | 616 | 6 | 0 |                     |                    |

\*Taxonomic affiliation of vSAG at the level of Family or Order is tentative and has to be taken very cautious since there is no experimental proof

**Supplementary Table 3. Comparison at the population level of the single-viruses with viral clusters obtained in the Global Ocean Virome (GOV) dataset<sup>11</sup>**

| <b>vSAG</b> | <b>Putative assignment<sup>a</sup></b> | <b>VC_2</b> | <b>VC_3</b> | <b>VC_5</b> | <b>VC_6</b> | <b>VC_8</b> | <b>VC_9</b> |
|-------------|----------------------------------------|-------------|-------------|-------------|-------------|-------------|-------------|
| 17-D16      | VC6                                    |             |             |             | <b>52</b>   |             |             |
| 17-D19      | VC6                                    |             |             |             | <b>184</b>  | 11          |             |
| 17-E11      | VC8                                    |             |             |             | 35          | <b>236</b>  |             |
| 37-D17      | VC5                                    |             |             | 345         |             |             |             |
| 37-J6       | VC5                                    |             |             | <b>1041</b> |             |             |             |
| 37-K11      | VC5                                    | 9           |             | <b>121</b>  | 4           | 4           | 19          |
| 37-F6       | VC8                                    |             |             |             | 59          | <b>413</b>  |             |
| 40-A23      | VC6                                    |             |             |             | <b>10</b>   |             |             |
| 40-B18      | VC5                                    |             |             | <b>15</b>   |             |             |             |
| 40-H15      | VC2                                    | <b>10</b>   |             |             |             |             |             |
| 40_L14      | VC6                                    |             |             |             | <b>89</b>   |             |             |
| 41-A4       | VC8                                    |             |             |             | 89          | <b>566</b>  |             |
| 41-D7       | VC5                                    |             | 37          | <b>1162</b> |             |             |             |
| 41-H17      | VC6                                    |             |             |             | <b>11</b>   | 1           |             |
| 41-H4       | VC3                                    | 2           | <b>40</b>   | 8           |             |             |             |
| 41-I14      | VC2                                    | 171         | 1           |             |             |             |             |
| 41-I16      | VC5                                    |             |             | <b>236</b>  |             |             |             |
| 41-I9       | VC5                                    |             |             | <b>146</b>  |             |             |             |
| 41-O11      | VC2                                    | 92          | 9           | 1           |             |             |             |

<sup>a</sup>Assignment was done based on genomic comparison by BLASTn against all bins and viral contigs in the GOV dataset. Only hits with GOV dataset with the following criteria were considered for assignment: bitscore threshold hit>100, sequence alignment length>500 bp, >10 hits spanning the genome and ≥80% of hits accumulated within the same VC. Alignment mean identity of hits with viral contigs/bins of VC was ≈70%. vSAGs not listed in the table showed an uncertain assignment

**Supplementary Table 4. Pairwise BLASTp comparison of vSAG with the closest virus in the global marine viral clusters (VCs) based on protein-sharing network analysis.**

| vSAG        | vSAG (contig)* - Closest virus in VC                   | No. of shared proteins | No. of total vSAG genes | %Pairwise | Putative new species (NS) or new genera (NG) <sup>β</sup> |
|-------------|--------------------------------------------------------|------------------------|-------------------------|-----------|-----------------------------------------------------------|
| vSAG-17-C23 | GOV_bin_5106_contig-100_0                              | 25                     | 116                     | 48.60     | NS                                                        |
| vSAG-17-D16 | GOV_bin_1735_contig-100_0                              | 15                     | 19                      | 62.56     | NS                                                        |
| vSAG-17-D19 | Contig 1- Tp1_123_SUR_0-0d2_scaffold29973_1            | 8                      | 11                      | 55.00     | NS                                                        |
|             | Contig 2- Tp1_123_DCM_0-0d2_scaffold46460_2            | 11                     | 16                      | 56.45     |                                                           |
| vSAG-17-E11 | GOV_bin_2164_contig-100_0                              | 3                      | 11                      | 56.00     | NS                                                        |
| vSAG-17-E15 | GOV_bin_4005_contig-100_0                              | 10                     | 35                      | 38.70     | NS                                                        |
| vSAG-17-F13 | GOV_bin_870_contig-100_1                               | 11                     | 14                      | 56.69     | NS                                                        |
| vSAG-17-F19 | Contig 1-Tp1_30_DCM_0-0d2_scaffold60669_1              | 16                     | 20                      | 99.73     | NS                                                        |
|             | Contig 2-GOV_bin_534_contig-100_2                      | 5                      | 5                       | 56.96     |                                                           |
|             | Contig 3-No Closest                                    | 0                      | 3                       | ---       |                                                           |
| vSAG-17-G23 | Contig 1-Tp1_23_DCM_0-0d2_scaffold128056_1             | 7                      | 10                      | 59.93     | NS                                                        |
|             | Contig 2-Tp1_23_DCM_0-0d2_scaffold112175_1             | 11                     | 13                      | 52.85     |                                                           |
| vSAG-30-E13 | GOV_bin_636_contig-100_5                               | 6                      | 31                      | 41.50     | NS                                                        |
| vSAG-30-J17 | GOV_bin_8033_contig-100_1                              | 7                      | 11                      | 56.00     | NS                                                        |
| vSAG-37-D17 | GOV_bin_3340_contig-100_6                              | 8                      | 11                      | 67.36     | NG                                                        |
| vSAG-37-F16 | vSAG-41-H4-contig2                                     | 15                     | 54                      | 69.67     | NS                                                        |
| vSAG-37-F6  | SAG AAA164-I21-contig 5                                | 18                     | 24                      | 65.16     | NS                                                        |
| vSAG-37-G23 | GOV_bin_4091_contig-100_8                              | 14                     | 18                      | 60.30     | NS                                                        |
| vSAG-37-H5  | Contig 1-GOV_bin_1874_contig-100_1                     | 19                     | 36                      | 56.07     | NS                                                        |
|             | Contig 2-Tp1_30_DCM_0-0d2_scaffold21665_1              | 16                     | 27                      | 61.41     |                                                           |
| vSAG-37-I21 | Tp1_82_SUR_0-0d2_scaffold12183_1                       | 18                     | 35                      | 47.69     | NS                                                        |
| vSAG-37-J6  | Contig 1-Tp1_36_DCM_0-0d2_scaffold99746_1              | 18                     | 34                      | 69.97     | NS                                                        |
|             | Contig 2-GOV_bin_3099_contig-100_0                     | 6                      | 6                       | 37.58     |                                                           |
| vSAG-37-K11 | Tp1_102_SUR_0-0d2_scaffold55818_1                      | 5                      | 17                      | 72.44     | NS                                                        |
| vSAG-37-K7  | Contig 1- No Closest                                   | 0                      | 11                      | ---       | NG                                                        |
|             | Contig 2- GOV_bin_5817_contig-100_0                    | 5                      | 6                       | 42.08     |                                                           |
|             | Contig 3- GOV_bin_4362_contig-100_0                    | 8                      | 11                      | 64.80     |                                                           |
|             | Contig 4- Tp1_32_SUR_0-0d2_scaffold63617_1             | 5                      | 12                      | 61.26     |                                                           |
| vSAG-37-L15 | Contig 1-GOV_bin_3005_contig-100_2                     | 5                      | 37                      | 52.64     | NS                                                        |
|             | Contig 2-Uncultured_Mediterranean_phage_uvMED_AP014493 | 10                     | 20                      | 55.71     |                                                           |
|             | Contig 3-No Closest                                    | 0                      | 2                       | ---       |                                                           |
| vSAG-37-M19 | GOV_bin_2674_contig-100_1                              | 27                     | 37                      | 79.50     | NS                                                        |

|               |                                               |              |              |              |    |
|---------------|-----------------------------------------------|--------------|--------------|--------------|----|
| vSAG-37-M8    | Tp1_100_DCM_0-0d2_scaffold6111_1              | 14           | 22           | 74.10        | NS |
| vSAG-37-P14   | Tp1_123_DCM_0-0d2_scaffold44431_1             | 6            | 6            | 46.58        | NG |
| vSAG-40-A23   | Tp1_111_DCM_0-0d2_scaffold17799_1             | 8            | 10           | 70.46        | NS |
| vSAG-40-B17   | Tp1_111_DCM_0-0d2_scaffold53353_1             | 13           | 15           | 75.85        | NG |
| vSAG-40-B18   | Tp1_31_SUR_0-0d2_scaffold205369_1             | 21           | 29           | 61.56        | NS |
| vSAG-40-D19   | GOV_bin_4866_contig-100_1                     | 14           | 36           | 53.90        | NS |
| vSAG-40-H15   | Uncultured_Mediterranean_phage_uvMED_AP014348 | 7            | 8            | 62.63        | NS |
| vSAG-40-J13   | GOV_bin_8324_contig-100_4                     | 5            | 10           | 88.68        | NS |
| vSAG-40-L14   | vSAG-17-D19-contig1                           | 8            | 12           | 53.43        | NS |
| vSAG-40-P19   | Tp1_124_SUR_0-0d2_scaffold12109_4             | 4            | 18           | 65.23        | NS |
| vSAG-41-A4    | Contig 1-GOV_bin_4626_contig-100_1            | 22           | 34           | 55.80        | NS |
|               | Contig 2- GOV_bin_2910_contig-100_1           | 17           | 29           | 49.59        |    |
| vSAG-41-D13   | GOV_bin_6709_contig-100_0                     | 7            | 14           | 60.84        | NG |
| vSAG-41-D7    | Contig 1-GOV_bin_2729_contig-100_2            | 14           | 31           | 56.44        | NS |
|               | Contig 2- GOV_bin_7344_contig-100_5           | 10           | 20           | 67.00        |    |
| vSAG-41-H16   | Tp1_125_DCM_0-0d2_scaffold6988_1              | 7            | 7            | 58.06        | NS |
| vSAG-41-H17   | Uncultured_Mediterranean_phage_uvMED_AP014380 | 13           | 19           | 65.05        | NS |
| vSAG-41-H4    | Contig 1-GOV_bin_3401_contig-100_0            | 20           | 39           | 56.89        | NS |
|               | Contig 2-vSAG-37-F16                          | 15           | 20           | 68.81        |    |
|               | Contig 3- GOV_bin_5740_contig-100_6           | 9            | 14           | 55.29        |    |
| vSAG-41-I14   | Tp1_102_DCM_0-0d2_scaffold2867_3              | 24           | 47           | 70.58        | NS |
| vSAG-41-I16   | GOV_bin_3340_contig-100_6                     | 5            | 9            | 55.43        | NS |
| vSAG-41-I18   | Contig 1-Tp1_22_SUR_0-0d2_scaffold30721_1     | 5            | 10           | 45.92        | NG |
|               | Contig 2- GOV_bin_3845_contig-100_3           | 5            | 10           | 78.06        |    |
| vSAG-41-I9    | Tp1_66_SUR_0-0d2_scaffold28495_4              | 4            | 4            | 68.88        | NS |
| vSAG-41-O11   | GOV_bin_4674_contig-100_0                     | 14           | 27           | 58.72        | NS |
| vSAG-80-3-I13 | GOV_bin_2729_contig-100_2                     | 16           | 22           | 58.86        | NS |
| vSAG-88-3-L14 | Tp1_25_DCM_0-0d2_scaffold2249_3               | 5            | 15           | 54.28        | NG |
| <b>MEAN</b>   |                                               | <b>11.29</b> | <b>20.73</b> | <b>60.38</b> |    |

\*In case two or more genome fragments (viral contig) were obtained from the vSAG, the closest viral genome in database is indicate

<sup>β</sup> Although application of viral taxonomy criteria to define viral species and genera remains complicated to uncultured viruses, in this study we have used the following criteria based on a previous study<sup>4</sup>. New genera are defined when the vSAGs presented weaker connections with closest viral relatives within the global marine viral network, as previously described<sup>4</sup>. New viral species are defined when  $\leq 95\%$  of nucleotide identity was obtained with the closest viral relative.



**Supplementary Table 5. Ranking of the first most recruiter viruses at different cut-off identities (70 and 95%) in different oceanic regions<sup>7,11,15,16</sup> for each viral datasets (single-viruses, fosmids<sup>10</sup>, virus isolates (Supplementary Table 9), viruses from microbial single amplified genomes (SAGs) cells<sup>9</sup>, viral genomes reconstructed by viromics from *Tara* Ocean Viromes (TOV)<sup>7</sup> and Global Ocean Viromes (GOV)<sup>11</sup>)**

| Viral genome dataset <sup>±</sup> | vSAG 37-F6 <sup>‡</sup> |     | vSAG |     | SAGs |     | Fosmids |    | Isolates |     | TOV |    | GOV |    |
|-----------------------------------|-------------------------|-----|------|-----|------|-----|---------|----|----------|-----|-----|----|-----|----|
|                                   | 70                      | 95  | 70   | 95  | 70   | 95  | 70      | 95 | 70       | 95  | 70  | 95 | 70  | 95 |
| <b>VIROME*</b>                    |                         |     |      |     |      |     |         |    |          |     |     |    |     |    |
| SS                                | 1                       | 55  | 1    | 14  | 67   | 652 | 5       | 7  | 8        | 6   | 7   | 1  | 2   | 3  |
| POV                               | 3                       | 15  | 3    | 15  | 8    | 14  | 1       | 1  | 20       | 18  | 10  | 2  | 11  | 26 |
| BBMO                              | 24                      | 99  | 1    | 7   | 134  | 268 | 3       | 1  | 18       | 18  | 122 | 24 | 2   | 12 |
| CP109                             | 6                       | 18  | 6    | 17  | 76   | 172 | 10      | 24 | 205      | 140 | 32  | 2  | 1   | 1  |
| MS018                             | 66                      | 369 | 66   | 91  | 145  | 398 | 1       | 1  | 14       | 59  | 25  | 9  | 113 | 74 |
| MS022                             | 7                       | 62  | 7    | 58  | 55   | 358 | 1       | 4  | 16       | 29  | 11  | 3  | 10  | 1  |
| MS025                             | 1                       | 2   | 1    | 2   | 10   | 115 | 5       | 1  | 32       | 65  | 38  | 14 | 4   | 3  |
| RS031                             | 1                       | 7   | 1    | 7   | 61   | 839 | 2       | 4  | 87       | 196 | 9   | 1  | 5   | 2  |
| RS032                             | 1                       | 18  | 1    | 18  | 83   | 823 | 3       | 14 | 49       | 36  | 5   | 2  | 2   | 1  |
| RS034                             | 6                       | 26  | 6    | 26  | 38   | 115 | 8       | 3  | 1        | 1   | 37  | 13 | 2   | 2  |
| NAS036                            | 238                     | 631 | 238  | 631 | 35   | 128 | 9       | 26 | 2        | 10  | 7   | 3  | 1   | 1  |
| IM038                             | 41                      | 215 | 41   | 67  | 45   | 292 | 1       | 1  | 16       | 18  | 26  | 6  | 18  | 12 |
| IM039                             | 39                      | 111 | 39   | 63  | 121  | 665 | 1       | 1  | 55       | 51  | 72  | 30 | 60  | 34 |
| IM041                             | 1                       | 2   | 1    | 2   | 30   | 158 | 3       | 1  | 130      | 112 | 10  | 8  | 7   | 10 |
| IM042                             | 1                       | 2   | 1    | 2   | 38   | 216 | 2       | 1  | 171      | 96  | 19  | 3  | 9   | 29 |
| IM046                             | 1                       | 10  | 1    | 10  | 79   | 597 | 2       | 3  | 161      | 235 | 36  | 5  | 9   | 1  |
| EA064                             | 1                       | 2   | 1    | 1   | 29   | 551 | 5       | 3  | 16       | 4   | 9   | 6  | 4   | 7  |
| EA065                             | 8                       | 58  | 8    | 29  | 160  | 733 | 1       | 1  | 37       | 15  | 67  | 4  | 9   | 43 |
| BC066                             | 1                       | 5   | 1    | 5   | 7    | 55  | 10      | 36 | 51       | 81  | 5   | 2  | 2   | 1  |
| BC067                             | 81                      | 688 | 16   | 55  | 9    | 17  | 1       | 10 | 49       | 47  | 3   | 1  | 43  | 20 |
| SA068                             | 1                       | 1   | 1    | 1   | 15   | 356 | 6       | 3  | 52       | 234 | 40  | 5  | 4   | 2  |
| SA070                             | 1                       | 3   | 1    | 3   | 40   | 347 | 3       | 8  | 30       | 31  | 28  | 5  | 6   | 1  |
| SA072                             | 1                       | 6   | 1    | 5   | 30   | 477 | 4       | 20 | 168      | 185 | 10  | 1  | 5   | 2  |
| SA076                             | 1                       | 3   | 1    | 3   | 24   | 514 | 7       | 19 | 42       | 118 | 5   | 1  | 4   | 14 |

<sup>‡</sup>Two first columns are for the vSAG 37-F6, which is the most recruiter virus in 13 of the 24 viromes and in the global marine virome. \*Viromes used are abbreviated as: Pacific Ocean (POV), Chile-Peru oceanic region (CP), South Atlantic (SS), Red Sea (RS), Mediterranean Sea (MS), Northwest Arabian Sea upwelling (NAS), Indian Monsoon gyre province (IM), Eastern Africa Coastal Province (EA), Benguela Current (BC), and Sargassos Sea (SS), and the Blanes Bay Microbial Observatory Virome (BBMO) which was constructed in this study. <sup>±</sup>Viral genomic dataset used were: 40 marine surface vSAGs (this study), SAGs: 20 viral genomes from uncultured single bacterial cells; Isolates: 180 reference marine virus isolates (Supplementary Table 9), Fosmids: 1148 viral fosmids; TOV: 5466 viral contigs from the *Tara* expedition; and GOV: 3594 sequences from the cosmopolitan viral clusters previously described (VCs 2,3,5,6,8 and 9)<sup>11</sup>.

**Supplementary Table 6. Comparison by BLASTn of genome of vSAG 37-F6 with the previously described viral cluster 8 (VC\_8; in this study VC\_2)<sup>11\*</sup>**

| <b>Name</b>                                  | <b>Bit-Score</b> | <b>Pairwise Identity</b> | <b>E Value</b> | <b>Hit end</b> | <b>Hit start</b> | <b>Query end</b> | <b>Query start</b> |
|----------------------------------------------|------------------|--------------------------|----------------|----------------|------------------|------------------|--------------------|
| unknown_gi_486908286 (SAG AAA164-I21)        | 1353.81          | 70                       | 0              | 612            | 3610             | 13588            | 10602              |
| unknown_gi_486908286 (SAG AAA164-I21)        | 1142.82          | 76                       | 0              | 8279           | 9887             | 5065             | 3480               |
| Flavobacteriia_gi_487372893 (SAG AAA160-P02) | 1092.32          | 72                       | 0              | 32034          | 29947            | 12683            | 10605              |
| GOV_bin_5468_contig-100_39                   | 966.089          | 71                       | 0              | 4638           | 2613             | 12620            | 10604              |
| GOV_bin_2346_contig-100_4                    | 933.628          | 71                       | 0              | 1790           | 3825             | 12620            | 10603              |
| GOV_bin_2164_contig-100_0                    | 904.774          | 70                       | 0              | 4841           | 6998             | 12975            | 10824              |
| Flavobacteriia_gi_487372893 (SAG AAA160-P02) | 839.853          | 72                       | 0              | 25190          | 23594            | 5070             | 3479               |
| GOV_bin_4626_contig-100_1                    | 791.162          | 72                       | 0              | 7594           | 6024             | 5082             | 3517               |
| GOV_bin_2346_contig-100_4                    | 751.488          | 71                       | 0              | 8610           | 10209            | 5078             | 3483               |

Only top ten best hits are shown

**Supplementary Table 7. Comparison of metaproteomic data from the Oregon coast bacterioplankton<sup>13</sup> to our surface vSAG.**

| Peptide name <sup>a</sup> | Amino acid sequence             | vSAG <sup>b</sup> |
|---------------------------|---------------------------------|-------------------|
| 8431                      | YTVYKNPYMTENVILMGYK             | 37-F16            |
| 6640                      | TAMEGDFDTGNVR                   | 37-F6             |
| 6420                      | SQLVKELEPGLNALFGLEYK            | 37-F6             |
| 5051                      | MIIPSELQFTAER                   | 37-F6             |
| 4982                      | MFNRAPLTTAMEGDFDTGNVR           | 37-F6             |
| 1627                      | ELEPGLNALFGLEYK                 | 37-F6             |
| 6422                      | SQLVKELEPGLNALFGLEYKR           | 37-F6             |
| 2780                      | QLVKELEPGLNALFGLEYK             | 37-F6             |
| 6706                      | TETYRDPDSFADIVR                 | 37-H5 contig 2    |
| 7662                      | VLLCDEFATPAVSK                  | 37-I21            |
| 4739                      | LSGEIGQVFGSR                    | 37-I21            |
| 4493                      | LISQSYLGNETEEDAIMPILPLIR        | 37-I21            |
| 4022                      | KLISQSYLGNETEEDAIMPILPLIR       | 37-I21            |
| 3356                      | IGFTDLIDGATSK                   | 37-I21            |
| 2454                      | GIENAILAGDDADGVYGTSGAAFEGLLHLAR | 37-I21            |
| 1336                      | DIENELVLAPLFR                   | 37-I21            |
| 5495                      | NLDKQGAIEENMLFLSR               | 37-J6 contig 1    |
| 5295                      | MVGAEMPMTSDQVIWSEQNR            | 37-J6 contig 1    |
| 4530                      | LLDEQNIPEEGR                    | 37-K7 contig 3    |
| 4739                      | LSGEIGQVFGSR                    | 37-M19            |
| 6387                      | SPIKTSMEGDFDTGNVR               | 41-A4 contig 1    |
| 5608                      | NQLVKELEPGLNALFGLEY             | 41-A4 contig 1    |
| 2780                      | QLVKELEPGLNALFGLEY              | 41-A4 contig 1    |
| 1627                      | ELEPGLNALFGLEY                  | 41-A4 contig 1    |
| 912                       | QLVKELEPGLNALFGLEY              | 41-A4 contig 1    |
| 3786                      | ITGFADMIQLTHLK                  | 41-D7 contig 1    |
| 2932                      | GVIVPAGTSTVYDQQLGK              | 41-D7 contig 1    |
| 6666                      | TASGISMLMSAANGSIR               | 41-H16            |
| 8431                      | YTVYKNPYMTENVILMGYK             | 41-H4 contig 2    |

<sup>b</sup>tBLASTx comparison was done and only those peptides matching 100% identity and coverage were considered

<sup>a</sup>Peptide name nomenclature was as in the original article<sup>13</sup>. A total of 7151 distinct peptide sequences were obtained in that study.

**Supplementary Table 8. Primers of vSAG 37-F6.**

| Primer pair | Name         | Sequence              | Minimum | Maximum | Length | Direction | Expected size |
|-------------|--------------|-----------------------|---------|---------|--------|-----------|---------------|
| 1           | 37F6_78 F    | ACGGGTCCAACCTGAACATCC | 78      | 97      | 20     | forward   | 639           |
| 1           | 37F6_716 R   | TAGCAGAGGATGGGTCAGCT  | 697     | 716     | 20     | reverse   |               |
| 2           | 37F6_697 F   | AGCTGACCCATCCTCTGCTA  | 697     | 716     | 20     | forward   | 1062          |
| 2           | 37F6_1,758 R | TGTGGTTTCGGGTGATGGAG  | 1,739   | 1,758   | 20     | reverse   |               |
| 3           | 37F6_697 F   | AGCTGACCCATCCTCTGCTA  | 697     | 716     | 20     | forward   | 1166          |
| 3           | 37F6_1,862 R | TGGTAATGCAGGCGTCCTTT  | 1,843   | 1,862   | 20     | reverse   |               |
| 4           | 37F6_4,647 F | GCATCCTCTGATCCTGCTCC  | 4,647   | 4,666   | 20     | forward   | 788           |
| 4           | 37F6_5,434 R | AGAACACAGGCTGAACCGAG  | 5,415   | 5,434   | 20     | reverse   |               |
| 5           | 37F6_6,849 F | TCCGACTGTATCACTCGGGT  | 6,849   | 6,868   | 20     | forward   | 818           |
| 5           | 37F6_7,666 R | AGGTGGTGGACTGTGCAAAA  | 7,647   | 7,666   | 20     | reverse   |               |

**Supplementary Table 9. Marine virus isolates used for fragment recruitment analyses. Genomes were obtained from Joint Genome Institute. All viruses labelled as marine origin were considered (as of date 21<sup>st</sup>, January, 2016).**

| Genome name IMG-JGI / Genbank ID                | Number of genes | Sequence Length (bp) |
|-------------------------------------------------|-----------------|----------------------|
| Bacteriophage 11b: NC_006356                    | 65              | 36012                |
| Bacteriophage K139: NC_003313                   | 44              | 33106                |
| Bacteriophage S-PM2 virion: NC_006820           | 264             | 196280               |
| Bacteriophage Syn9 virus: NC_008296             | 235             | 176847               |
| Bacteriophage VfO3K6: NC_002362                 | 10              | 8784                 |
| Bacteriophage VfO4K68: NC_002363                | 8               | 6891                 |
| Cellulophaga phage phi10:1 / NC_021802          | 108             | 53664                |
| Cellulophaga phage phi12:1 / NC_021791          | 64              | 39148                |
| Cellulophaga phage phi12:2 / NC_021797          | 13              | 6453                 |
| Cellulophaga phage phi12a:1 / NC_021805         | 13              | 6478                 |
| Cellulophaga phage phi13:2 / NC_021803          | 128             | 72369                |
| Cellulophaga phage phi14:2 / NC_021806          | 133             | 100418               |
| Cellulophaga phage phi17:1 / NC_021795          | 65              | 38776                |
| Cellulophaga phage phi17:2 / NC_021798          | 221             | 145343               |
| Cellulophaga phage phi18:1 / NC_021790          | 65              | 39189                |
| Cellulophaga phage phi18:3 / NC_021794          | 123             | 71443                |
| Cellulophaga phage phi19:1 / NC_021799          | 118             | 57447                |
| Cellulophaga phage phi3:1 / Ga0039577_11        | 36              | 22893                |
| Cellulophaga phage phi38:1 / NC_021796          | 117             | 72534                |
| Cellulophaga phage phi39:1 / NC_021804          | 48              | 28760                |
| Cellulophaga phage phi4:1 / NC_021788           | 221             | 145865               |
| Cellulophaga phage phi46:1 / NC_021800          | 54              | 34844                |
| Cellulophaga phage phi46:3 / NC_021792          | 121             | 72961                |
| Cellulophaga phage phi47:1 / HQ670749           | 81              | 60552                |
| Cellulophaga phage phi48:2 / NC_021793          | 29              | 11703                |
| Cellulophaga phage phiSM / HQ317392             | 59              | 44557                |
| Cellulophaga phage phiST / Ga0040773_11         | 109             | 79114                |
| Cyanophage 9515-10a / Ga0034026_11              | 62              | 47055                |
| Cyanophage KBS-P-1A / Ga0032521_11              | 63              | 45730                |
| Cyanophage KBS-S-1A / Ga0032522_11              | 60              | 32402                |
| Cyanophage KBS-S-2A / Ga0039582_11              | 62              | 40658                |
| Cyanophage MED4-117 / Ga0039388_11              | 66              | 38834                |
| Cyanophage NATL1A-7 / Ga0034027_gi310005689.1   | 74              | 47741                |
| Cyanophage NATL2A-133 / Ga0034029_gi310005755.1 | 73              | 47536                |
| Cyanophage P60: NC_003390                       | 80              | 47872                |
| Cyanophage PP / NC_022751                       | 41              | 42480                |
| Cyanophage P-RSM1 / HQ634175                    | 215             | 177211               |
| Cyanophage P-RSM3 / HQ634176                    | 211             | 178750               |

|                                                            |     |        |
|------------------------------------------------------------|-----|--------|
| Cyanophage P-RSM6 / Ga0040776_11                           | 229 | 192497 |
| Cyanophage P-SS1 / Ga0040801_11                            | 223 | 178284 |
| Cyanophage PSS2 / GU071090                                 | 122 | 105532 |
| Cyanophage PSS2: NC_013021                                 | 131 | 107530 |
| Cyanophage P-SSM2: NC_006883                               | 330 | 252401 |
| Cyanophage P-SSM4: NC_006884                               | 198 | 178249 |
| Cyanophage P-SSP2 / Ga0034028_gi310005818.1                | 59  | 45890  |
| Cyanophage P-SSP7: NC_006882                               | 53  | 44970  |
| Cyanophage SS120-1 / HQ316584                              | 53  | 46997  |
| Cyanophage S-SSM2 / Ga0032571_11                           | 209 | 179980 |
| Cyanophage S-SSM6a / HQ317391                              | 311 | 232883 |
| Cyanophage S-SSM6b / HQ316603                              | 221 | 182368 |
| Cyanophage S-TIM5 / NC_019516                              | 190 | 161440 |
| Cyanophage Syn10 / Ga0040497_11                            | 219 | 177103 |
| Cyanophage Syn2 / Ga0032453_11                             | 218 | 175596 |
| Cyanophage Syn30 / Ga0032525_11                            | 225 | 178807 |
| Cyanophage Syn5: NC_009531                                 | 61  | 46214  |
| Emiliana huxleyi virus 86                                  | 477 | 407339 |
| Flavobacterium phage 6H / NC_021867                        | 63  | 46978  |
| Marine bacteriophage RNA virus SOG                         | 3   | 4449   |
| Marine birnavirus - AY-98 VP1 / AY123970.1                 | 1   | 2778   |
| Marine gokushovirus                                        | 6   | 4129   |
| Marine RNA virus JP-A                                      | 2   | 9236   |
| Marine RNA virus JP-B                                      | 2   | 8926   |
| Marinomonas phage P12026                                   | 54  | 31766  |
| Ostreococcus lucimarinus virus OIV1                        | 255 | 194022 |
| Ostreococcus lucimarinus virus OIV3                        | 265 | 191242 |
| Ostreococcus lucimarinus virus OIV5                        | 265 | 186468 |
| Ostreococcus tauri virus 1                                 | 232 | 191761 |
| Ostreococcus tauri virus 2                                 | 237 | 184409 |
| Ostreococcus virus OsV5                                    | 269 | 185373 |
| Paracoccus phage vB_PmaS_IMEP1 / Ga0062596_vB_PmaS_IMEP1.1 | 55  | 42093  |
| Pelagibacter phage HTVC008M / NC_020484                    | 198 | 147284 |
| Pelagibacter phage HTVC010P / NC_020481                    | 64  | 34892  |
| Pelagibacter phage HTVC011P / NC_020482                    | 45  | 39921  |
| Pelagibacter phage HTVC019P / NC_020483                    | 59  | 42084  |
| Prochlorococcus phage MED4-184 / Ga0032523_11              | 65  | 38327  |
| Prochlorococcus phage MED4-213 / HQ634174                  | 218 | 180977 |
| Prochlorococcus phage P-GSP1 / HQ332140                    | 53  | 44945  |
| Prochlorococcus phage P-HM1:NC_015280                      | 241 | 181044 |
| Prochlorococcus phage P-HM2:NC_015284                      | 242 | 183806 |
| Prochlorococcus phage P-RSM4:NC_015283                     | 242 | 176428 |

|                                                            |     |        |
|------------------------------------------------------------|-----|--------|
| Prochlorococcus phage P-RSP2 / HQ332139                    | 48  | 42257  |
| Prochlorococcus phage P-SSM2 / GU071092                    | 332 | 252407 |
| Prochlorococcus phage P-SSM3 / Ga0032395_11                | 231 | 179063 |
| Prochlorococcus phage P-SSM5 / HQ632825                    | 331 | 252013 |
| Prochlorococcus phage P-SSM7: NC_015290                    | 241 | 182180 |
| Prochlorococcus phage P-SSP10 / Ga0039583_11               | 61  | 47325  |
| Prochlorococcus phage P-SSP3 / HQ332137                    | 56  | 46198  |
| Prochlorococcus phage P-SSP7 / GU071093                    | 52  | 45135  |
| Prochlorococcus phage Syn1: NC_015288                      | 240 | 191195 |
| Prochlorococcus phage Syn33: NC_015285                     | 232 | 174285 |
| Pseudoalteromonas phage PSA-HS4 (complete) / Ga0074570_11  | 68  | 38739  |
| Puniceispirillum phage HMO-2011                            | 43  | 52512  |
| Roseobacter phage RDJL Phi 1: NC_015466                    | 87  | 62668  |
| Roseophage SIO1: NC_002519                                 | 34  | 39898  |
| Synechococcus phage KBS-M-1A / Ga0039581_11                | 226 | 171744 |
| Synechococcus phage metaG-MbCM1 / NC_019443                | 234 | 172879 |
| Synechococcus phage S-CAM1 / HQ634177                      | 241 | 198013 |
| Synechococcus phage S-CAM8 / Ga0039739_11                  | 277 | 222057 |
| Synechococcus phage S-CAM8 / HQ634178                      | 209 | 171407 |
| Synechococcus phage S-CBM2 / HQ633061                      | 212 | 180892 |
| Synechococcus phage S-CBP2 / Ga0032396_11                  | 137 | 92473  |
| Synechococcus phage S-CBP3 / HQ633062                      | 57  | 47375  |
| Synechococcus phage S-CBP4 / Ga0039743_11                  | 57  | 41824  |
| Synechococcus phage S-CBS1 / Ga0035795_11                  | 47  | 30332  |
| Synechococcus phage S-CBS2: NC_015463                      | 102 | 72332  |
| Synechococcus phage S-CBS3: NC_015465                      | 46  | 33004  |
| Synechococcus phage S-CBS4 / Ga0035827_gi374531742.1       | 108 | 69420  |
| Synechococcus phage S-CBS4 / HQ634148                      | 167 | 105580 |
| Synechococcus phage S-CRM01: NC_015569                     | 330 | 178563 |
| Synechococcus phage S-IOM18 / HQ317383                     | 219 | 171797 |
| Synechococcus phage S-MbCM6 / NC_019444                    | 225 | 176043 |
| Synechococcus phage S-RIM2 R1_1999 / HQ317292              | 216 | 175430 |
| Synechococcus phage S-RIM2 R21_2007 / HQ317290             | 214 | 175430 |
| Synechococcus phage S-RIM2 R9_2006 / HQ317291              | 217 | 175419 |
| Synechococcus phage S-RIM8 A.HR1 / Ga0039740_gi375918176.1 | 225 | 171211 |
| Synechococcus phage S-RIM8 A.HR3 / Ga0032513_gi375919032.1 | 225 | 171211 |
| Synechococcus phage S-RIM8 A.HR5 / HQ317385                | 211 | 168327 |
| Synechococcus phage S-RIP1 / HQ317388                      | 61  | 44892  |
| Synechococcus phage S-RIP2 / HQ317389                      | 57  | 45728  |
| Synechococcus phage S-RSM4: NC_013085                      | 249 | 194454 |
| Synechococcus phage S-ShM2: NC_015281                      | 231 | 179563 |

|                                                              |     |        |
|--------------------------------------------------------------|-----|--------|
| Synechococcus phage S-SKS1 / HQ633071                        | 302 | 208007 |
| Synechococcus phage S-SM1: NC_015282                         | 240 | 174079 |
| Synechococcus phage S-SM2: NC_015279                         | 278 | 190789 |
| Synechococcus phage S-SSM4 / HQ316583                        | 223 | 182801 |
| Synechococcus phage S-SSM5: NC_015289                        | 229 | 176184 |
| Synechococcus phage S-SSM7: NC_015287                        | 324 | 232878 |
| Synechococcus phage Syn19: NC_015286                         | 221 | 175230 |
| Vibrio cholerae filamentous bacteriophage fs-2:<br>NC_001956 | 9   | 8651   |
| Vibrio cholerae O139 fs1 phage: NC_004306                    | 15  | 6340   |
| Vibrio cholerae phage KSF-1phi virus: NC_006294              | 12  | 7107   |
| Vibrio cholerae phage VGJphi virion: NC_004736               | 13  | 7542   |
| Vibrio harveyi bacteriophage VHML: NC_004456                 | 57  | 43198  |
| Vibrio phage 11895-B1 / Ga0040774_11                         | 206 | 126434 |
| Vibrio phage CP-T1 / NC_019457                               | 70  | 44492  |
| Vibrio phage CTX chromosome I: NC_015209                     | 13  | 10638  |
| Vibrio phage douglas 12A4 / HQ316580                         | 75  | 57611  |
| Vibrio phage eugene 12A10 / HQ634195                         | 253 | 138234 |
| Vibrio phage helene 12B3 / HQ316579                          | 265 | 135982 |
| Vibrio phage henriette 12B8 / HQ316582                       | 156 | 107218 |
| Vibrio phage ICP1: NC_015157                                 | 230 | 125956 |
| Vibrio phage ICP2: NC_015158                                 | 72  | 49675  |
| Vibrio phage ICP3: NC_015159                                 | 54  | 39162  |
| Vibrio phage JA-1 / NC_021540                                | 80  | 69278  |
| Vibrio phage jenny 12G5 / HQ632860                           | 75  | 40557  |
| Vibrio phage kappa: NC_010275                                | 45  | 33134  |
| Vibrio phage KVP40: NC_005083                                | 410 | 244834 |
| Vibrio phage martha 12B12 / HQ316581                         | 51  | 33277  |
| Vibrio phage N4: NC_013651                                   | 47  | 38497  |
| Vibrio phage nt-1 / HQ317393                                 | 405 | 247511 |
| Vibrio phage pVp-1 / NC_019529                               | 157 | 111506 |
| Vibrio phage PWH3a-P1 / Ga0039735_11                         | 216 | 129155 |
| Vibrio phage pYD21-A / Ga0032403_11                          | 75  | 46917  |
| Vibrio phage pYD38-A / Ga0032404_11                          | 76  | 47552  |
| Vibrio phage pYD38-B / Ga0040529_11                          | 60  | 37324  |
| Vibrio phage SIO-2 / HQ316604                                | 116 | 81184  |
| Vibrio phage vB_VchM-138 / NC_019518                         | 67  | 44485  |
| Vibrio phage vB_VpaM_MAR / NC_019722                         | 62  | 41351  |
| Vibrio phage vB_VpaS_MAR10 / NC_019713                       | 107 | 78751  |
| Vibrio phage VBM1 / HQ317386                                 | 56  | 38374  |
| Vibrio phage VBP32 / Ga0032561_11                            | 117 | 76718  |
| Vibrio phage VBP47 / Ga0040770_11                            | 119 | 76705  |
| Vibrio phage VBpm10 / Ga0039578_11                           | 62  | 33314  |



|                                                               |     |       |
|---------------------------------------------------------------|-----|-------|
| Vibrio phage VCY-phi / Ga0036010_11                           | 11  | 7103  |
| Vibrio phage VD1 / Ga0032407_11                               | 116 | 81013 |
| Vibrio phage VEJphi: NC_012757                                | 11  | 6842  |
| Vibrio phage Vf12: NC_005949                                  | 7   | 7965  |
| Vibrio phage Vf33: NC_005948                                  | 7   | 7965  |
| Vibrio phage VFJ / NC_021562                                  | 12  | 8555  |
| Vibrio phage VP882: NC_009016                                 | 71  | 38197 |
| Vibrio phage VP93: NC_012662                                  | 44  | 43931 |
| Vibrio phage VPMS1 / NC_021776                                | 53  | 42313 |
| Vibrio phage VPUSM 8 / NC_022747                              | 43  | 34145 |
| Vibrio phage VSK: NC_003327                                   | 14  | 6882  |
| Vibriophage VP2: NC_005879                                    | 47  | 39853 |
| Vibriophage VP4: NC_007149                                    | 31  | 39503 |
| Vibriophage VP5: NC_005891                                    | 48  | 39786 |
| Vibriophage VpV262: NC_003907                                 | 67  | 46012 |
| Yellowtail ascites virus strain AY-98 segment A /<br>AY283785 | 2   | 3092  |

---

## Supplementary Notes

### **Supplementary Note 1: Fluorescence activated virus sorting (FAVS) and whole genome amplification (WGA): some technical considerations**

Viruses are sorted at random, which means that the more abundant a virus is in the sample the higher is the probability to be sorted and deposited in a 384-well plate, and thus, is directly proportional to its abundance. Assuming that the treatment to break capsids is effective to most naturally co-occurring viruses, in theory, with a low sequencing effort, SVGs guarantees the recovering of genetic information of prevalent viral components. Furthermore, as sequencing costs has dropped dramatically in the last five years along with new inexpensive multiplexed libraries strategies<sup>17</sup> and the fact that the sequencing coverage for a virus is significantly less than for a single-cell, genome recovery of low abundant viruses by increasing the number of positive vSAGs selected for sequencing should be feasible.

### **Supplementary Note 2: Evaluation of free DNA content in microdroplets from seawater**

Initially, the interference of free DNA present in seawater that could be co-sorted along with single-viruses and amplified during WGA was assessed (see methods), but data indicated that its potential contribution was negligent (Supplementary Fig. 4d-e) since only two wells from a 384-well plate yielded positive amplification.

### **Supplementary Note 3: Gene-content based network analysis of marine vSAGs**

Of the 61 marine vSAG sequences, 57 were retained in the network and 4 (17-C23-contig2, 17-F19-contig3, 37-K7-contig1, 37-L15-contig3) were excluded, due to few significant similarities to other sequences in the dataset. In cases where a vSAG consisted of several sequences (e.g. 17-F19, 37-K7, 41-H4), vSAG fragments were mostly associated within the same viral clusters (VCs) in GOV<sup>11</sup>, except in some cases where small contigs were obtained along with the large genome fragment, such as the vSAG 17-F19-contig1 (15,706 bp) and contig2 (2,525 bp) that were related to members of VC13, whereas contig3 (2,236 bp) was not found within that network. In cases where disagreements exist, it is highly likely that each sequence fragment carries a different set of gene sequences less related to genes on its sister fragment than to genes present on sequences in separate VCs. The 57 sequences were related to a total of 31 VCs. The VCs ranged in size from 2 (VC\_733) to 1090 (VC\_0), with most vSAGs associated with large (>100 sequence) VCs. The 19 vSAGs identified through comparison using BLASTn (Supplementary Table 4) covered 14 of the GOV-associated VCs. Disagreements between the BLASTn and network analysis could arise from the differences in approaches, where BLASTn tends to reveal highly related sequences though pairwise relationships whereas the gene-based method allows for sequences to associate with multiple others, with sequences sharing the greatest proportion of genes being placed within the same cluster. In general, the larger the VC the more likely it contained a GOV-associated VC and agreed with BLAST. Due to the inclusion of archaeal and bacterial viruses from NCBI RefSeq, preliminary taxonomic predictions could be made in the context of reference sequences within each VC. Tentative affiliations could only be made for 24 of the 57 sequences (21 vSAGs) due to the lack of any reference sequence within

the VCs (Supplementary Table 3). All taxonomic predictions were of the *Caudovirales*, with 18 sequences (15 vSAGs) classified in the *Podoviridae* family, 3 sequences (3 vSAGs) as *Myoviridae* and 3 sequences (3 vSAGs) as *Siphoviridae*. The overall prediction quality of all but 2 sequences (17-C23-contig1, 30-E13) were low, as most of the VCs containing reference sequences were supported by 1-2 references within VCs containing 130 to over 200 sequences. The strongest support was for vSAG 17-C23-contig1 and 30-E13, both members of VC\_78 and likely T5-like viruses.

#### **Supplementary Note 4: Virome recruitment of marine single amplified viral genomes (vSAGs)**

In this study, with 44 surface vSAGs that added up to  $\approx 1$  Mb of genomic assembled dataset (<5 million raw reads), we have unveiled the genome of superabundant uncultured viruses with very high virome recruitment frequencies. In the *Tara* virome survey<sup>7</sup>, with 5,476 viral contigs (109 Mb of assembled genome data and 2,16 billion raw reads) recruited up to 9.97%<sup>7</sup>. However, after normalization of recruitment rate according to total assembled genomic data, 1 Mb of single-virus genomic data would recruit  $\approx 3.5$ -fold more than data obtained by viromics (Supplementary Fig. 13). Finally, the overall sequencing effort carried out here to deliver 44 reference genomes compared to previous viromic surveys<sup>7</sup> was significantly less, at least a 3-fold decrease.

#### **Supplementary Note 5: Structure of marine viral populations. Microdiversity matters for metagenomic assembly: the diversity curves**

The diversity curves that represent the relative distribution of recruited reads at different nucleotide identities for a given viral reference genome in a virome informs about the structure and (micro)-diversity of a particular viral population at the species and genus level. In general, for most vSAGs and reference virus isolates showed a unimodal pattern in the diversity curve with a recruitment peak of recruited read frequency near 90% of identity and no recruitment was observed below 75% of identity. To summarize, we propose a model based on our obtained diversity curves that is depicted in Supplementary Fig 10c:

- 1) In general, the more (micro-) diverse is a viral population, the lower is the height of the curve (value H), and the higher is the width of the curve (value W) (Supplementary Fig 10c). In contrast, in a scenario where an abundant virus has no viral relatives co-existing in the same population (no microdiversity), the pattern of its viral population structure would be a narrow sharp curve, such as the metagenomic contigs depicted in Fig. 6b.
- 2) Recruited reads with identity values around 95% or higher were likely from our reference vSAG and/or close viral relatives belonging mostly to the same population at species-level.
- 3) Recruited reads with identity values under the observed empirical peak around 90% are from viral relatives belonging mostly to the same population at the genus or sub-family levels.

As shown in Fig. 6a, single-virus genomic approach can uncover the reference genome of uncultured viral populations regardless of the accumulated microdiversity since the complexity in terms of genome reconstruction is simplified. For viromics, in

general (Fig. 6a), we have observed that the species-specific recruitment patterns for many of the most abundant assembled genomes (viral contigs) in their own *Tara* viromes lacked of microdiversity. We analyzed over 50 abundant viral species (Fig. 6a; for convenience only 12 are shown in that panel) obtained from *Tara dataset* in different oceanic regions, and overall, the obtained pattern suggested a lack of microdiversity in these viral species populations at the sampling site where they were generated. This likely means, as we demonstrated in our simulated viromes (Fig. 6c, Supplementary Fig 20), that the assembler resolved successfully the genome reconstruction only for those populations mostly when the microdiversity scenario was low and there was sufficient sequencing coverage to be assembled; in other words, overall fairly abundant in the viral community and very dominant within its population. In turn, for those highly microdiverse and diverse populations, despite they are abundant, the assembler yielded small genome fragments and a very partial reconstruction. In the case of the *Tara* expedition<sup>32</sup>, where MOCAT assembler was used, all obtained diversity curves for assembled viral contigs that were abundant in the corresponding viral assemblages lacked of microdiversity, except in two viral contigs (22SUR\_22922 and 64SUR\_1238) where the observed species-specific recruitment pattern indicated low microdiversity. In our study, with our virome from Blanes, we have observed that with IDBA\_UD and SPAdes assemblers, in some cases, they delivered viral contigs representing viral populations with moderate microdiversity. Thus, the selection of the metagenomic assembler could have a negative impact on the genomic reconstruction, biasing thus the biological conclusions. We suggest from our analyses, that SPAdes could outperform other programs in terms of resolving the genome reconstruction from microdiverse viral populations.

Finally, it is important to remark that nearly all diversity curves obtained for the tested reference viral isolates, fosmids, vSAGs and viruses found in single-cells for all studied viromes (Supplementary Fig 10) showed that viral populations in general tend to be structured accumulating diversity and microdiversity. Therefore, the fact of finding diversity curves lacking of microdiversity when a viral contig “X” is compared against its own virome “X”, shows:

- 1) that virus “X” clearly bloomed in that specific virome “X” dominating its population over other viral relatives belonging to same population (e.g. kill the winner scenario)

- 2) the inability of the assembler in general to resolve the assembly from highly microdiverse and diverse viral populations regardless the abundance. In fact, for many cases where a particular viral contig in its own virome showed a diversity curve lacking of microdiversity (e.g. above case of virus “X”), when it was computed for other viromes (Y, Z, etc...), the curve revealed the existing microdiversity of that population, indicating likely that in these other virome samples, that particular virus “X” was not dominating the population. However, we hypothesize that from the later virome sample (virome Y or Z), where dominance of the virus X was not observed; likely the genome of virus X would not be reconstructed by assemblers such as MOCAT.

## Supplementary Methods

### Simulation of natural viromes with different degrees of microdiversity

Firstly, we selected the *Tara* virome MS022<sup>7</sup> from the Mediterranean Sea for our simulation as a model since we previously demonstrated by fragment recruitment and diversity curves the presence of the highly microdiverse population of vSAG 37-F6. It is worth noting that in a previous study<sup>7</sup>, from this natural virome dataset, MOCAT assembler was unable to reconstruct the genome of virus vSAG 37-F6 despite its abundance. Later, with the same dataset, by using IDBA\_UD, which in principle outperforms MOCAT assembler, combined with genome binning<sup>11</sup> failed on the genome reconstruction of virus 37-F6. From that *Tara* virome MS022 dataset, we subtracted the raw reads corresponding with 37-F6 virus population. For that, we mapped the whole *Tara* virome MS022 against reference virus vSAG 37-F6 and a total of 74,278 reads were removed from the dataset. Geneious bioinformatic program<sup>18</sup> was used to map and subtract the reads with the parameters previously used for fragment recruitment (identity >70% and mean coverage >90%). Supplementary Fig. 20d shows that no reads belonging to 37-F6 population remained in the dataset. The trimming tool Trimmomatic version 0.36 was used to ensure that all remained reads in the virome were in the paired-end format for the metagenomic assembly after removing reads corresponding to vSAG 37-F6 population. Then, taking the reference genome vSAG 37-F6, we simulated three scenarios with different populations, A, B and C with different degrees of microdiversity and diversity (Supplementary Fig. 20b). Population A has no microdiversity with two simulated genomes (genome of vSAG 37-F6 and a simulated genome 1 with >99.9% nucleotide identity) and only 20 SNPs of difference. Population B is a low microdiverse population with 5 simulated genomes with approximately  $\geq 95\%$  nucleotide genome identity along all genome including in the hypervariable genome island (Fig. 4 and Supplementary Fig. 14). This is likely a simplistic scenario since in many cases even close viral relatives have a large variability in the hypervariable genomic island<sup>19</sup>. Population C is a medium-high microdiverse population with 10 simulated genomes. Eight of which had approximately  $\geq 90\%$  nucleotide genome identity along all genome, except in the genomic island, where higher genetic variability was introduced among the simulated genomes with <50% nucleotide identity in that region. The global nucleotide identity value of 90% was taken from the empirical peak observed in the resulting diversity curves for the natural population of vSAG 37-F6 in *Tara* MS022 virome (Supplementary Fig. 10). The value of 50% of identity for the genomic island has been taken according to the recruitment plot obtained for vSAG 37-F6 in different viromes where very high variability was observed. In addition, existing data on the co-existence of several virus isolate strains with high global genome identity but high variability in the genomic islands are described<sup>19</sup>. The remaining two simulated genomes (no. 7 and 9) were genetically more distant with the rest of genomes, approximately 80% identity value. The genomes were simulated with the publicly available bioinformatic tool at the following link: [http://www.bioinformatics.org/sms2/mutate\\_dna.html](http://www.bioinformatics.org/sms2/mutate_dna.html). Then, with these simulated genomes for each population and assuming equal abundance of each genome within the population, we generated approximately a total of 74,278 Illumina reads for each population by using the program Art<sup>20</sup> that can simulate the same Illumina error rate

for the HiSeq 2000 platform previously used to sequence the *Tara* virome dataset. The parameters used were `art_illumina -ss HS20 -sam -p -l 100 -s 10 -o paired_dat`. (Supplementary Fig. 20c). Those simulated reads from each one of the populations were merged with the *Tara* MS022 virome where reads of 37-F6 were removed (Supplementary Fig. 20d). So, three different *Tara* MS022 viromes were finally constructed with different and controlled degrees of microdiversity, (Supplementary Fig. 20e) in which the reference genomes forming that population were known. Finally, these three simulated natural viromes were assembled by IDBA\_UD with the same parameters previously used (`--mink 20 --maxk 100 --step 20 --min_contig 1000`) and described for that virome reconstruction<sup>11</sup>. In addition, SPAdes<sup>21</sup> version 3.9 was used with the following parameters for metagenomic assembly: `“metaspades.py -k 33,55,77,99”`. Obtained contigs were mapped against the simulated reference genomes for each one of the population with the following cut-off parameters:  $\geq 95\%$  of identity value and  $\geq 80\%$  of contig coverage.

## Supplementary References

1. Brussaard, C. P. D. Optimization of Procedures for Counting Viruses by Flow Cytometry. *Appl. Environ. Microbiol.* **70**, 1506–1513 (2004).
2. Tennessen, K. *et al.* ProDeGe: a computational protocol for fully automated decontamination of genomes. *ISME J.* **10**, 269–272 (2015).
3. Mills, R., Rozanov, M., Lomsadze, A., Tatusova, T. & Borodovsky, M. Improving gene annotation of complete viral genomes. *Nucleic Acids Res.* **31**, 7041–7055 (2003).
4. Besemer, J. & Borodovsky, M. GeneMark: Web software for gene finding in prokaryotes, eukaryotes and viruses. *Nucleic Acids Res.* **33**, 451–454 (2005).
5. Mizuno, C. M., Ghai, R., Saghai, A., López-García, P. & Rodriguez-Valera, F. Genomes of abundant and widespread viruses from the deep ocean. *MBio* **7**, e00805-16 (2016).
6. Marchler-Bauer, A. *et al.* CDD: a Conserved Domain Database for the functional annotation of proteins. *Nucleic Acids Res.* **39**, D225-9 (2011).
7. Brum, J. R. *et al.* Ocean plankton. Patterns and ecological drivers of ocean viral communities. *Science* **348**, 1261498 (2015).
8. Caro-quintero, A. & Konstantinidis, K. T. Bacterial species may exist, metagenomics reveal. *Environ. Microbiol.* **14**, 347–55 (2012).
9. Labonté, J. M. *et al.* Single-cell genomics-based analysis of virus-host interactions in marine surface bacterioplankton. *ISME J.* **9**, 2386–2399 (2015).
10. Mizuno, C. M., Rodriguez-Valera, F., Kimes, N. E. & Ghai, R. Expanding the marine virosphere using metagenomics. *PLoS Genet.* **9**, e1003987 (2013).
11. Roux, S. *et al.* Ecogenomics and potential biogeochemical impacts of globally abundant ocean viruses. *Nature* **537**, 689–693 (2016).
12. Brum, J. R. *et al.* Illuminating structural proteins in viral ‘dark matter’ with metaproteomics. *Proc. Natl. Acad. Sci. U. S. A.* **113**, 2436–2441 (2016).
13. Sowell, S. M. *et al.* Environmental proteomics of microbial plankton in a highly productive coastal upwelling system. *ISME J.* **5**, 856–65 (2011).
14. Zhao, Y. *et al.* Abundant SAR11 viruses in the ocean. *Nature* **494**, 357–360 (2013).
15. Hurwitz, B. L. & Sullivan, M. B. The Pacific Ocean Virome (POV): a marine viral metagenomic dataset and associated protein clusters for quantitative viral ecology.

*PLoS One* **8**, (2013).

16. Angly, F. E. *et al.* The marine viromes of four oceanic regions. *PLoS Biol.* **4**, e368 (2006).
17. Baym, M. *et al.* Inexpensive multiplexed library preparation for megabase-sized genomes. *PLoS One* **10**, 1–15 (2015).
18. Kearse, M. *et al.* Geneious Basic: an integrated and extendable desktop software platform for the organization and analysis of sequence data. *Bioinformatics* **28**, 1647–9 (2012).
19. Mizuno, C. M., Ghai, R. & Rodriguez-Valera, F. Evidence for metaviromic islands in marine phages. *Front. Microbiol.* **5**, (2014).
20. Huang, W., Li, L., Myers, J. R. & Marth, G. T. ART: a next-generation sequencing read simulator. *Bioinformatics* **28**, 593–4 (2012).
21. Bankevich, A. *et al.* SPAdes: a new genome assembly algorithm and its applications to single-cell sequencing. *J. Comput. Biol.* **19**, 455–77 (2012).
